# Supplementary material for: Effect of Probiotics on Psychiatric Symptoms and Central Nervous System Functions in Human Health and Disease: A Systematic Review and Meta-Analysis
Source: MDPI journal article supplement (doi:10.3390/nu14030621), 2022-01-30

# Effect of Probiotics on Central Nervous System Functions in health and disease of humans: A Systematic Review and Meta-Analysis

Charlotte Le Morvan de Sequeira<sup>1</sup>, Charlotte Hengstberger<sup>1</sup>, Paul Enck<sup>1</sup> and Isabelle Mack<sup>1\*</sup>

<sup>1</sup>Department of Psychosomatic Medicine and Psychotherapy, University Medical Hospital, 72076 Tübingen, Germany

\*Correspondence: isabelle.mack@uni-tuebingen.de

## SUPPORTING INFORMATION:

### Text S1. Search Strategy.

#### PubMed-

((("Healthy Volunteers"[Mesh] OR Healthy\*[tiab]) OR ("Fatigue Syndrome, Chronic"[Mesh] OR Chronic Fatigue Syndrome\*[tiab] OR CFS[tiab] OR "Anxiety Disorders"[Mesh] OR Agoraphobia\*[tiab] OR Separation Anxiety[tiab] OR Neurocirculatory Asthenia[tiab] OR Effort Syndrome[tiab] OR Cardiac Neurosis[tiab] OR Cardiac Neuroses[tiab] OR Hyperkinetic Heart Syndrome[tiab] OR Neurotic Disorder\*[tiab] OR Psychoneuroses[tiab] OR Neuroses[tiab] OR Obsessive Compulsive Disorder\*[tiab] OR Anankastic Personality[tiab] OR Hoarding Disorder\*[tiab] OR Panic Disorder\*[tiab] OR Panic Attack\*[tiab] OR Phobic Disorder\*[tiab] OR Phobic Neuroses[tiab] OR phobic neurosis[tiab] OR Phobia\*[tiab] OR Claustrophobia\*[tiab] OR Social Anxiety Disorder\*[tiab] OR "Bipolar and Related Disorders"[Mesh] OR Bipolar Disorder\*[tiab] OR Manic Depressive Psychosis[tiab] OR Bipolar Affective Psychosis[tiab] OR Manic Depressive Psychoses[tiab] OR Psychoses, Manic Depressive[tiab] OR Mania\*[tiab] OR Manic State\*[tiab] OR Bipolar Depression\*[tiab] OR Manic Disorder\*[tiab] OR ("Feeding and Eating Disorders"[Mesh] NOT ("Feeding and Eating Disorders of Childhood"[Mesh] OR "Pica"[Mesh] OR "Relative Energy Deficiency in Sport"[Mesh] OR "Rumination Syndrome"[Mesh])) OR Eating Disorder\*[tiab] OR Appetite Disorder\*[tiab] OR Anorexia Nervosa[tiab] OR Avoidant Restrictive Food Intake Disorder[tiab] OR Food Neophobia[tiab] OR Food Neophobic[tiab] OR ARFID[tiab] OR Binge Eating Disorder\*[tiab] OR Bulimia Nervosa[tiab] OR Diabulimia[tiab] OR Food Addiction\*[tiab] OR Night Eating Syndrome[tiab] OR "Mood Disorders"[Mesh] OR Mood Disorder\*[tiab] OR Affective Disorder\*[tiab] OR Cyclothymic Disorder\*[tiab] OR Depression\*[tiab] OR Depressive[tiab] OR Dysthymic Disorder\*[tiab] OR Premenstrual Dysphoric Disorder[tiab] OR "Seasonal Mood Disorder"[tiab] OR "Seasonal Mood Disorders"[tiab] OR Seasonal Affective Disorder\*[tiab] OR "Neurocognitive Disorders"[Mesh:NoExp] OR Neurocognitive Disorder\*[tiab] OR Traumatic Psychoses[tiab] OR "Amnesia"[Mesh] OR Amnesia\*[tiab] OR ("Cognition Disorders"[Mesh] NOT "Huntington Disease"[Mesh]) OR Cognition Disorder\*[tiab] OR Overinclusion\*[tiab] OR Auditory Perceptual Disorders[tiab] OR "Auditory Perceptual Disorder"[tiab] OR Auditory Processing Disorder\*[tiab] OR "Auditory Comprehension Disorders"[tiab] OR Cognitive Dysfunction\*[tiab] OR Cognitive Impairment\*[tiab] OR Cognitive Decline\*[tiab] OR Mental Deterioration[tiab] OR Postoperative Cognitive Complications[tiab] OR Consciousness Disorder\*[tiab] OR "Neurodevelopmental Disorders"[Mesh] OR (Neurodevelopmental Disorder\*[tiab] NOT ("Stereotypic Movement Disorder"[Mesh] OR "Tic Disorders"[Mesh])) OR Separation Anxiety[tiab] OR Attention Deficit Disorders with Hyperactivity[tiab] OR Attention Deficit Hyperactivity Disorder\*[tiab] OR Hyperkinetic Syndrome[tiab] OR ADHD[tiab] OR Attention Deficit Hyperactivity Disorder[tiab] OR Attention Deficit Disorder\*[tiab] OR Minimal Brain Dysfunction[tiab] OR Conduct Disorder\*[tiab] OR Child Behavior Disorders[tiab] OR Autism Spectrum Disorder\*[tiab] OR Asperger\*[tiab] OR Autism[tiab] OR Autistic[tiab] OR Communication Disorder\*[tiab] OR "Communicative Dysfunction"[tiab] OR "Communicative Dysfunctions"[tiab] OR Communication Disabilit\*[tiab] OR Fluency Disorder\*[tiab] OR Speech Sound Disorder\*[tiab] OR Phonological Disorder\*[tiab] OR Developmental Disabilit\*[tiab] OR Intellectual Disabilit\*[tiab] OR Intellectual Development Disorder\*[tiab] OR Mental Retardation[tiab] OR Idiocy[tiab] OR Mental Deficienc\*[tiab] OR Learning Disabilit\*[tiab] OR Learning Disorder\*[tiab] OR Learning Disturbance\*[tiab] OR Dyscalculia\*[tiab] OR Acalculia[tiab] OR Dyslexia[tiab] OR Word Blindness[tiab] OR Reading Disorders[tiab] OR "Reading Disorder"[tiab] OR Alexia[tiab] OR Language Disorder\*[tiab] OR Language Impairment\*[tiab] OR Motor Skills Disorder\*[tiab] OR Developmental Coordination Disorder\*[tiab] OR Mutism\*[tiab] OR Reactive Attachment Disorder[tiab] OR "Reactive Attachment Disorders"[tiab] OR "Neurotic Disorders"[Mesh] OR Neurotic Disorder\*[tiab] OR Psychoneuroses[tiab] OR

Neuroses[tiab] OR "Personality Disorders"[Mesh] OR Personality Disorder\*[tiab] OR Inadequate Personalit\*[tiab] OR Sociopathic Personality[tiab] OR "Sociopathic Personalities"[tiab] OR Psychopathic Personality[tiab] OR Antisocial Personalit\*[tiab] OR Dyssocial Behavior[tiab] OR Borderline[tiab] OR Hysteria\*[tiab] OR Paranoid[tiab] OR Schizoid[tiab] OR Schizotypal[tiab] OR "Schizophrenia Spectrum and Other Psychotic Disorders"[Mesh] OR Psychosis[tiab] OR Psychotic[tiab] OR Capgras[tiab] OR delusional parasitosis[tiab] OR Psychogenic Parasitosis[tiab] OR Ekblom[tiab] OR Delusory Parasitosis[tiab] OR Morgellons[tiab] OR Paranoia\*[tiab] OR Paranoid[tiab] OR Schizoaffective[tiab] OR Schizophreniform[tiab] OR Schizophrenia\*[tiab] OR Schizophrenic[tiab] OR "Sleep Wake Disorders"[Mesh] OR Sleep Wake Disorder\*[tiab] OR Sleep Disorder\*[tiab] OR "Sleep Related Neurogenic Tachypnea"[tiab] OR Long Sleep\*[tiab] OR Short Sleep\*[tiab] OR Dyssomnia\*[tiab] OR Sleep Deprivation\*[tiab] OR Sleep Fragmentation\*[tiab] OR Insufficient Sleep Syndrome[tiab] OR Circadian Rhythm Sleep Disorder\*[tiab] OR Sleep Wake Cycle Disorder\*[tiab] OR Advanced Sleep Phase Syndrome[tiab] OR Delayed Sleep Phase Syndrome[tiab] OR Jet Lag[tiab] OR Sleep State Misperception[tiab] OR Hypersomnia\*[tiab] OR Kleine Levin[tiab] OR Paroxysmal Sleep[tiab] OR Narcoleptic[tiab] OR Gelineau[tiab] OR Narcolepsy[tiab] OR Cataleptic[tiab] OR Restless Legs[tiab] OR Disorders of Initiating and Maintaining Sleep[tiab] OR DIMS[tiab] OR Early Awakening[tiab] OR Insomnia\*[tiab] OR Sleeplessness[tiab] OR Parasomnia\*[tiab] OR "Sleep Drunkenness"[tiab] OR Nocturnal Paroxysmal Dystonia[tiab] OR Sleep Paralysis[tiab] OR Sleep Arousal Disorder\*[tiab] OR Sleep Terror Disorder[tiab] OR Night Terror\*[tiab] OR Pavor Nocturnus[tiab] OR Somnambulism[tiab] OR Sleepwalking[tiab] OR Sleep walking[tiab] OR Sleep Bruxism[tiab] OR Sleep Wake Transition Disorder\*[tiab] OR Nocturnal Leg Cramp\*[tiab] OR Jactatio Capitis Nocturna[tiab] OR "Trauma and Stressor Related Disorders"[Mesh] OR Reactive Disorder\*[tiab] OR Adjustment Disorder\*[tiab] OR Transient Situational Disturbance\*[tiab] OR Stress Disorder\*[tiab] OR Battered Child Syndrome[tiab] OR Combat Disorders[tiab] OR Shell Shock[tiab] OR psychological trauma\*[tiab] OR "Fibromyalgia"[Mesh] OR Fibromyalgia\*[tiab] OR FMS[tiab])) AND (("Probiotics"[Mesh] OR Probiotic\*[tiab] OR Paraprobiotic\*[tiab] OR bacterial lysate\*[tiab] OR Psychobiotic\*[tiab]) NOT (Synbiotic\*[tiab] NOT ("Probiotics"[Mesh] OR Probiotic\*[tiab] OR Paraprobiotic\*[tiab] OR bacterial lysate\*[tiab] OR Psychobiotic\*[tiab]))) AND ("Treatment Outcome"[Mesh] OR Treatment Outcome[tiab] OR Clinical Effectiveness[tiab] OR Treatment Effectiveness[tiab] OR Treatment Efficacy[tiab] OR Clinical Efficacy[tiab] OR "Electroencephalography"[Mesh] OR EEG[tiab] OR Electroencephalogram\*[tiab] OR Electroencephalograph\*[tiab] OR "Magnetoencephalography"[Mesh] OR Magnetoencephalograph\*[tiab] OR "Magnetic Resonance Imaging"[Mesh] OR Magnetic Resonance Imaging[tiab] OR NMR Imaging[tiab] OR NMR Tomography[tiab] OR MRI[tiab] OR Zeugmatography[tiab] OR Shift Imaging[tiab] OR "Functional MRI"[tiab] OR "Functional Magnetic Resonance Imaging"[tiab] OR ((Measur\*[tiab] OR Test\*[tiab]) AND (Behaviour[tiab] OR Behavior[tiab] OR Neuropsychologic\*[tiab] OR Psychometric\*[tiab]))) AND (("Randomized Controlled Trial" [Publication Type] OR (randomized[tiab] AND controlled[tiab] AND trial\*[tiab]) OR (Placebo[tiab] AND controlled[tiab] AND trial\*[tiab])) OR ("Double-Blind Method"[Mesh] OR Double Blind Method[tiab] OR Double Blind Methods[tiab] OR Double Masked Method[tiab] OR Double Masked Methods[tiab] OR Double Masked Stud\*[tiab] OR Double Blind Stud\*[tiab]))

#### **Cochrane Library-**

[mh "Healthy Volunteers"] OR (Healthy\*):ti,ab,kw[mh "Fatigue Syndrome, Chronic"] OR ("Chronic Fatigue Syndrome" OR CFS):ti,ab,kw OR [mh "Anxiety Disorders"] OR (Agoraphobia\* OR "Separation Anxiety" OR "Neurocirculatory Asthenia" OR "Effort Syndrome" OR "Cardiac Neuros?s" OR "Hyperkinetic Heart Syndrome" OR "Neurotic Disorder\*" OR Psychoneuros?s OR Neuros?s OR "Obsessive Compulsive Disorder\*" OR "Anankastic Personality" OR "Hoarding Disorder\*" OR "Panic Disorder\*" OR "Panic Attack\*" OR "Phobic Disorder\*" OR "Phobic Neuros?s" OR Phobia\* OR Claustrophobia\* OR "Social Anxiety Disorder\*"):ti,ab,kw OR [mh "Bipolar and Related Disorders"] OR ("Bipolar Disorder\*" OR "Manic Depressive Psychos?s" OR "Bipolar Affective Psychos?s" OR Mania\* OR "Manic State\*" OR "Bipolar Depression\*" OR "Manic Disorder\*"):ti,ab,kw OR ([mh "Feeding and Eating Disorders"] NOT ([mh "Feeding and Eating Disorders of Childhood"] OR [mh "Pica"] OR [mh "Relative Energy Deficiency in Sport"] OR [mh "Rumination Syndrome"])) OR ("Eating Disorder\*" OR "Appetite Disorder\*" OR "Anorexia Nervosa" OR "Avoidant Restrictive Food Intake Disorder" OR "Food Neophobia" OR "Food Neophobic" OR ARFID OR "Binge Eating Disorder\*" OR "Bulimia Nervosa" OR Diabulimia OR "Food Addiction\*" OR "Night Eating Syndrome"):ti,ab,kw OR [mh "Mood Disorders"] OR ("Mood Disorder\*" OR "Affective Disorder\*" OR "Cyclothymic Disorder\*" OR Depression\* OR Depressive OR "Dysthymic Disorder\*" OR "Premenstrual Dysphoric Disorder" OR "Seasonal Mood Disorder\*" OR "Seasonal Affective Disorder\*"):ti,ab,kw OR [mh "Neurocognitive Disorders"] OR ("Neurocognitive Disorder\*" OR "Traumatic Psychoses"):ti,ab,kw OR [mh "Amnesia"] OR

(Amnesia\*):ti,ab,kw OR ([mh "Cognition Disorders"] NOT [mh "Huntington Disease"]) OR ("Cognition Disorder\*" OR Overinclusion\* OR "Auditory Perceptual Disorder\*" OR "Auditory Processing Disorder\*" OR "Auditory Comprehension Disorders" OR "Cognitive Dysfunction\*" OR "Cognitive Impairment\*" OR "Cognitive Decline\*" OR "Mental Deterioration" OR "Postoperative Cognitive Complications" OR "Consciousness Disorder\*"):ti,ab,kw OR [mh "Neurodevelopmental Disorders"] OR (("Neurodevelopmental Disorder\*"):ti,ab,kw NOT ([mh "Stereotypic Movement Disorder"] OR [mh "Tic Disorders"])) OR ("Separation Anxiety" OR "Attention Deficit Disorders with Hyperactivity" OR "Attention Deficit Hyperactivity Disorder\*" OR "Hyperkinetic Syndrome" OR ADDH OR "Attention Deficit Hyperactivity Disorder" OR "Attention Deficit Disorder\*" OR "Minimal Brain Dysfunction" OR "Conduct Disorder\*" OR "Child Behavior Disorders" OR "Autism Spectrum Disorder\*" OR Asperger\* OR Autism OR Autistic OR "Communication Disorder\*" OR "Communicative Dysfunction" OR "Communicative Dysfunctions" OR "Communication Disabilit\*" OR "Fluency Disorder\*" OR "Speech Sound Disorder\*" OR "Phonological Disorder\*" OR "Developmental Disabilit\*" OR "Intellectual Disabilit\*" OR "Intellectual Development Disorder\*" OR "Mental Retardation" OR Idiocy OR "Mental Deficienc\*" OR "Learning Disabilit\*" OR "Learning Disorder\*" OR "Learning Disturbance\*" OR Dyscalculia\* OR Acalculia OR Dyslexia\* OR "Word Blindness" OR "Reading Disorders\*" OR Alexia OR "Language Disorder\*" OR "Language Impairment\*" OR "Motor Skills Disorder\*" OR "Developmental Coordination Disorder\*" OR Mutism\* OR "Reactive Attachment Disorder\*"):ti,ab,kw OR [mh "Neurotic Disorders"] OR ("Neurotic Disorder\*" OR Psychoneuro?s OR Neuros?s):ti,ab,kw OR [mh "Personality Disorders"] OR ("Personality Disorder\*" OR "Inadequate Personalit\*" OR "Sociopathic Personalit\*" OR "Psychopathic Personalit\*" OR "Antisocial Personalit\*" OR "Dyssocial Behavio?r" OR Borderline OR Hysteria\* OR Schizoid OR Schizotypal):ti,ab,kw OR [mh "Schizophrenia Spectrum and Other Psychotic Disorders"] OR (Psychosis OR Psychotic OR Capgras OR "delusional parasitosis" OR "Psychogenic Parasitosis" OR Ekbohm OR "Delusory Parasitosis" OR Morgellons OR Paranoia\* OR Paranoid OR Schizoaffective OR Schizophreniform OR Schizophrenia\* OR Schizophrenic):ti,ab,kw OR [mh "Sleep Wake Disorders"] OR ("Sleep Wake Disorder\*" OR "Sleep Disorder\*" OR "Sleep Related Neurogenic Tachypnea" OR "Long Sleep\*" OR "Short Sleep\*" OR Dysomnia\* OR "Sleep Deprivation\*" OR "Sleep Fragmentation\*" OR "Insufficient Sleep Syndrome" OR "Circadian Rhythm Sleep Disorder\*" OR "Sleep Wake Cycle Disorder\*" OR "Advanced Sleep Phase Syndrome" OR "Delayed Sleep Phase Syndrome" OR "Jet Lag" OR "Sleep State Misperception" OR Hypersomnia\* OR "Kleine Levin" OR "Paroxysmal Sleep" OR Narcoleptic OR Gelineau OR Narcolepsy OR Cataleptic OR "Restless Legs" OR "Disorders of Initiating and Maintaining Sleep" OR DIMS OR "Early Awakening" OR Insomnia\* OR Sleeplessness OR Parasomnia\* OR "Sleep Drunkenness" OR "Nocturnal Paroxysmal Dystonia" OR "Sleep Paralysis" OR "Sleep Arousal Disorder\*" OR "Sleep Terror Disorder" OR "Night Terror\*" OR "Pavor Nocturnus" OR Somnambulism OR Sleepwalking OR "Sleep walking" OR "Sleep Bruxism" OR "Sleep Wake Transition Disorder\*" OR "Nocturnal Leg Cramp\*" OR "Jactatio Capitis Nocturna"):ti,ab,kw OR [mh "Trauma and Stressor Related Disorders"] OR ("Reactive Disorder\*" OR "Adjustment Disorder\*" OR Transient Situational Disturbance\*" OR "Stress Disorder\*" OR "Battered Child Syndrome" OR "Combat Disorders" OR "Shell Shock" OR "psychological trauma\*"):ti,ab,kw OR [mh "Fibromyalgia"] OR (Fibromyalgia\* OR FMS):ti,ab,kw([mh "Probiotics"] OR (Probiotic\* OR Paraprobiotic\* OR "bacterial lysate\*" OR Psychobiotic\*):ti,ab,kw) NOT ((Synbiotic\*):ti,ab,kw NOT ([mh "Probiotics"] OR (Probiotic\* OR Paraprobiotic\* OR "bacterial lysate\*" OR Psychobiotic\*):ti,ab,kw)) [mh "Treatment Outcome"] OR ("Treatment Outcome" OR "Clinical Effectiveness" OR "Treatment Effectiveness" OR "Treatment Efficacy" OR "Clinical Efficacy"):ti,ab,kw OR [mh "Electroencephalography"] OR (EEG OR Electroencephalogram\* OR Electroencephalograph\*):ti,ab,kw OR [mh "Magnetoencephalography"] OR (Magnetoencephalograph\*):ti,ab,kw OR [mh "Magnetic Resonance Imaging"] OR ("Magnetic Resonance Imaging" OR "NMR Imaging" OR "NMR Tomography" OR MRI OR Zeugmatography OR "Shift Imaging" OR "Functional MRI" OR "Functional Magnetic Resonance Imaging"):ti,ab,kw OR (((Measur\* OR Test\*):ti,ab,kw) AND ((Behavio?r OR Neuropsychologic\* OR Psychometric\*):ti,ab,kw)) (Randomized Controlled Trial):pt OR ((randomized NEAR/0 controlled NEAR/0 trial\*):ti,ab,kw) OR ((Placebo NEAR/0 controlled NEAR/0 trial\*):ti,ab,kw) OR [mh "Double-Blind Method"] OR ("Double Blind Method\*" OR "Double Masked Method\*" OR "Double Masked Stud\*" OR "Double Blind Stud\*"):ti,ab,kw

## Web of Science-

TS=(Healthy NEAR/3 Volunteer\*)TS=(“Chronic Fatigue Syndrome\*” OR CFS OR (Anxiety NEAR/2 Disorder\*) OR Agoraphobia\* OR “Separation Anxiet\*” OR “Neurocirculatory Asthenia\*” OR “Effort Syndrome\*” OR (Cardiac NEAR/1 Neuros?s) OR “Hyperkinetic Heart Syndrome” OR (Neurotic NEAR/2 Disorder\*) OR Psychoneuro?s OR Neuros?s OR “Obsessive Compulsive Disorder\*” OR (Anankastic NEAR/2 Personalit\*) OR (Hoarding NEAR/2 Disorder\*) OR (Panic NEAR/2 (Attack\* OR Disorder\*)) OR (Phobic NEAR/2 (Disorder\* OR Neuros?s)) OR Phobia\*

OR Claustrophobia\* OR "Social Anxiety Disorder\*" OR (Bipolar NEAR/2 Disorder\*) OR "Manic Depressive Psychos?s" OR "Bipolar Affective Psychos?s" OR Mania\* OR (Manic NEAR/2 State\*) OR (Bipolar NEAR/2 Depression\*) OR (Manic NEAR/2 Disorder\*) OR ((Feeding OR Eating OR Appetite) NEAR/2 Disorder\*) OR "Anorexia Nervosa" OR "Avoidant Restrictive Food Intake Disorder" OR "Food Neophobi\*" OR ARFID[tiab] OR "Binge Eating Disorder\*" OR "Bulimia Nervosa" OR Diabulimia OR (Food NEAR/2 Addiction\*) OR "Night Eating Syndrome\*" OR ((Mood OR Affective OR Cyclothymic OR Dysthymic OR Neurocognitive OR Cognition OR Consciousness) NEAR/2 Disorders\*) OR Depression\* OR Depressive OR "Premenstrual Dysphoric Disorder" OR "Seasonal Mood Disorder\*" OR "Seasonal Affective Disorder\*" OR (Traumatic NEAR/2 Psychos?s) OR Amnesia\* OR ((Cognition NEAR/0 Disorder\*) NOT "Huntington Disease") OR Overinclusion\* OR "Auditory Perceptual Disorder\*" OR "Auditory Comprehension Disorder\*" OR (Cognitive NEAR/2 (Dysfunction\* OR Impairment\* OR Decline)) OR (Mental NEAR/2 Deterioration) OR (Postoperative NEAR/2 Cognitive NEAR/2 Complication\*) OR ("Neurodevelopmental Disorder\*" NOT ("Stereotypic Movement Disorder\*" OR "Tic Disorder\*")) OR "Attention Deficit Hyperactivity Disorder\*" OR (Hyperkinetic NEAR/2 Syndrome\*) OR ADDH OR "Attention Deficit Disorder\*" OR "Minimal Brain Dysfunction" OR ((Conduct OR (Child NEAR/0 Behavior?) OR (Autism NEAR/0 Spectrum)) NEAR/2 Disorder\*) OR Asperger\* OR Autism OR Autistic OR ((Communication OR Communicative) NEAR/2 (Disorder\* OR Dysfunction\* OR Disability\*)) OR ((Fluency OR "Speech Sound" OR Phonological) NEAR/2 Disorder\*) OR ((Developmental OR Intellectual) NEAR/2 Disability) OR "Intellectual Development Disorder\*" OR (Mental NEAR/2 Retardation\*) OR Idiocy OR (Mental NEAR/2 Deficiency) OR (Learning NEAR/2 (Disability\* OR Disorder\* OR Disturbance\*)) OR Dyscalculia\* OR Acalculia\* OR Dyslexia\* OR "Word Blindness" OR (Reading NEAR/2 Disorder\*) OR Alexia\* OR (Language NEAR/2 (Disorder\* OR Impairment\*)) OR "Motor Skills Disorder\*" OR "Developmental Coordination Disorder\*" OR Mutism\* OR "Reactive Attachment Disorder\*" OR "Neurotic Disorder\*" OR Psychoneuroses OR Neuroses OR (Personality NEAR/2 Disorder\*) OR ((Inadequate OR Sociopathic OR Psychopathic OR Antisocial) NEAR/2 Personality) OR "Dyssocial Behavior?" OR Borderline OR Hysteria\* OR Paranoid OR Schizoid OR Schizotypa OR Schizophrenia\* OR Psychos?s OR Psychotic\* OR Capgras OR ((delusional OR Delusory OR Psychogenic) NEAR/2 parasitos?s) OR Ekblom OR Morgellons OR Paranoia\* OR Paranoid OR Schizoaffective OR Schizophreniform OR Schizophrenic OR "Sleep Wake Disorder\*" OR "Sleep Disorder\*" OR "Sleep Related Neurogenic Tachypnea" OR ((Long OR Short) NEAR/2 Sleep\*) OR Dyssomnia\* OR (Sleep NEAR/0 (Deprivation\* OR Fragmentation\*)) OR "Insufficient Sleep Syndrome" OR "Circadian Rhythm Sleep Disorder\*" OR "Sleep Wake Cycle Disorder\*" OR "Advanced Sleep Phase Syndrome\*" OR "Delayed Sleep Phase Syndrome\*" OR "Jet Lag" OR "Sleep State Misperception\*" OR Hypersomnia\* OR "Kleine Levin" OR (Paroxysmal NEAR/2 Sleep) OR Narcoleptic\* OR Gelineau OR Narcolepsy OR Cataleptic\* OR "Restless Legs" OR "Disorders of Initiating and Maintaining Sleep" OR DIMS OR "Early Awakening" OR Insomnia\* OR Sleeplessness OR Parasomnia\* OR "Sleep Drunkenness" OR "Nocturnal Paroxysmal Dystonia\*" OR (Sleep NEAR/0 (Paralysis OR Arousal NEAR/0 Disorder\*) OR (Terror NEAR/0 Disorder\*) OR Walking OR Bruxism)) OR "Night Terror\*" OR "Pavor Nocturnus" OR Somnambulism OR Sleepwalking OR "Sleep Wake Transition Disorder\*" OR "Nocturnal Leg Cramp\*" OR "Jactatio Capitis Nocturna" OR "Trauma and Stressor Related Disorder\*" OR ((Reactive OR Trauma OR Adjustment OR Stress OR Combat) NEAR/2 Disorder\*) OR "Transient Situational Disturbance\*" OR "Battered Child Syndrome" OR "Shell Shock" OR "psychological trauma\*" OR Fibromyalgia\* OR FMS) TS=((Probiotic\* OR Paraprobiotic\* OR "bacterial lysate\*" OR Psychobiotic\*) NOT (Synbiotic\* NOT (Probiotic\* OR Paraprobiotic\* OR "bacterial lysate\*" OR Psychobiotic\*))) TS=("Treatment Outcome" OR ((Clinical OR Treatment) NEAR/2 (Effectiveness OR Efficacy)) OR Electroencephalography OR EEG OR Electroencephalogram\* OR Electroencephalograph\* OR Magnetoencephalograph\* OR "Magnetic Resonance Imaging" OR "NMR Imaging" OR "NMR Tomography" OR MRI OR Zeugmatography OR "Shift Imaging\*" OR "Functional Magnetic Resonance Imaging" OR ((Measur\* OR Test\*) NEAR/5 (Behavior?r OR Neuropsychologic\* OR Psychometric\*))) TS=("Randomized Controlled Trial" OR (randomized NEAR/2 controlled NEAR/2 trial\*) OR (Placebo NEAR/2 controlled NEAR/2 trial\*) OR "Double Blind Method\*" OR "Double Masked Method\*" OR "Double Masked Stud\*" OR "Double Blind Stud\*")

**Table S1. Bacterial Species of Probiotics.**

| Article                            | Name of the product or manufacturer                        | Species                                                                                                                                                                                                                                                                                                                                                                                                                                   |
|------------------------------------|------------------------------------------------------------|-------------------------------------------------------------------------------------------------------------------------------------------------------------------------------------------------------------------------------------------------------------------------------------------------------------------------------------------------------------------------------------------------------------------------------------------|
| <b>Akkasheh et al. (2016)</b>      | Tak Gen Zist Pharmaceutical Company                        | <i>Lactobacillus acidophilus</i><br><i>Lactobacillus casei</i><br><i>Bifidobacterium bifidum</i>                                                                                                                                                                                                                                                                                                                                          |
| <b>Adikari et al. (2020)</b>       | commercially available by the Ministry of Health, Malaysia | <i>Lactobacillus Casei Shirota</i>                                                                                                                                                                                                                                                                                                                                                                                                        |
| <b>Allen et al. (2016)</b>         | Alimentary Health                                          | <i>Bifidobacterium longum</i> 1714                                                                                                                                                                                                                                                                                                                                                                                                        |
| <b>Bagga et al. (2018)</b>         | Ecologic 825 by Winclove Probiotics                        | <i>Lactobacillus casei</i> W56<br><i>Lactobacillus acidophilus</i> W22<br><i>Lactobacillus paracasei</i> W20<br><i>Bifidobacterium lactis</i> W51<br><i>Lactobacillus salivarius</i> W24<br><i>Lactobacillus lactis</i> W19<br><i>Bifidobacterium lactis</i> W52<br><i>Lactobacillus plantarum</i> W62<br><i>Bifidobacterium bifidum</i> W23                                                                                              |
| <b>Bagga et al. (2019)</b>         | Ecologic 825 by Winclove Probiotics                        | <i>Lactobacillus casei</i> W56<br><i>Lactobacillus acidophilus</i> W22<br><i>Lactobacillus paracasei</i> W20<br><i>Bifidobacterium lactis</i> W51<br><i>Lactobacillus salivarius</i> W24<br><i>Lactobacillus lactis</i> W19<br><i>Bifidobacterium lactis</i> W52<br><i>Lactobacillus plantarum</i> W62<br><i>Bifidobacterium bifidum</i> W23                                                                                              |
| <b>Benton et al. (2007)</b>        | Yakult                                                     | <i>Lactobacillus casei Shirota</i>                                                                                                                                                                                                                                                                                                                                                                                                        |
| <b>Chung et al. (2014)</b>         | sponsored by ILDONG Pharmaceutical Co., Ltd.               | <i>Lactobacillus helveticus</i> IDCC3801                                                                                                                                                                                                                                                                                                                                                                                                  |
| <b>De Lorenzo et al. (2017)</b>    | Biocult Strong, HOMEOSYN                                   | <i>Streptococcus thermophilus</i> SGSt01<br><i>Bifidobacterium animalis</i> subsp. <i>Lactis</i> SGB06<br><i>Streptococcus thermophiles</i><br><i>Bifidobacterium bifidum</i> SGB02<br><i>Lactobacillus delbrueckii</i> spp. <i>Bulgaricus</i> DSM 20081<br><i>Lactococcus lactis</i> subsp. <i>Lactis</i> SGLc01<br><i>Lactobacillus acidophilus</i> SGL11<br><i>Lactobacillus plantarum</i> SGL07<br><i>Lactobacillus reuteri</i> SGL01 |
| <b>Dickerson et al. (2014)</b>     | Biform Balance                                             | <i>Lactobacillus rhamnosus</i> strain GG<br><i>Bifidobacterium animalis</i> subsp. <i>lactis</i> Bb12                                                                                                                                                                                                                                                                                                                                     |
| <b>Dickerson et al. (2018)</b>     | Chr. Hansen                                                | <i>Lactobacillus</i> GG<br><i>Bifidobacterium lactis</i> strain Bb12                                                                                                                                                                                                                                                                                                                                                                      |
| <b>Diop et al. (2008)</b>          | Probio Stick                                               | <i>Lactobacillus acidophilus</i> Rosell - 52<br><i>Bifidobacterium longum</i> Rosell - 175                                                                                                                                                                                                                                                                                                                                                |
| <b>Eskandarzadeh et al. (2021)</b> | Takgene Zist Company                                       | <i>Bifidobacterium longum</i><br><i>Bifidobacterium bifidum</i>                                                                                                                                                                                                                                                                                                                                                                           |

|                                   |                                                                          |                                                                                                                                                                                                                                                                                                                                                                                                                                                                                                                                                 |
|-----------------------------------|--------------------------------------------------------------------------|-------------------------------------------------------------------------------------------------------------------------------------------------------------------------------------------------------------------------------------------------------------------------------------------------------------------------------------------------------------------------------------------------------------------------------------------------------------------------------------------------------------------------------------------------|
|                                   |                                                                          | <i>Bifidobacterium lactis</i><br><i>Lactobacillus acidophilus</i> bacteria                                                                                                                                                                                                                                                                                                                                                                                                                                                                      |
| <b>Ghaderi et al. (2019)</b>      | Lacto Care                                                               | <i>Lactobacillus acidophilus</i><br><i>Bifidobacterium bifidum</i><br><i>Lactobacillus reuteri</i><br><i>Lactobacillus fermentum</i>                                                                                                                                                                                                                                                                                                                                                                                                            |
| <b>Gualtieri et al. (2020)</b>    | Biocult Strong,<br>HOMEOSYN                                              | <i>Streptococcus thermophiles</i> (CNCM strain number I-1630)<br><i>Bifidobacterium animalis</i> subsp. <i>Lactis</i><br><i>Bifidobacterium bifidum</i><br><i>Streptococcus thermophiles</i><br><i>Lactobacillus bulgaricus</i><br><i>Lactococcus lactis</i> subsp. <i>lactis</i><br><i>Lactobacillus acidophilus</i><br><i>Lactobacillus plantarum</i><br><i>Lactobacillus reuteri</i>                                                                                                                                                         |
| <b>Ho et al. (2021)</b>           | PS128 by Bened Biomedical Co. Ltd. (Taipei, Taiwan)                      | <i>Lactobacillus plantarum</i> PS128                                                                                                                                                                                                                                                                                                                                                                                                                                                                                                            |
| <b>Hwang et al. (2019)</b>        | CHEBIGEN Inc.                                                            | DW2009 <i>Lactobacillus plantarum</i> C29                                                                                                                                                                                                                                                                                                                                                                                                                                                                                                       |
| <b>Inoue et al. (2018)</b>        | Morinaga Milk Industry Co., Ltd.                                         | <i>B. longum</i> BB536<br><i>B. infantis</i> M-53<br><i>B. breve</i> M-16V<br><i>B. breve</i> B-3                                                                                                                                                                                                                                                                                                                                                                                                                                               |
| <b>Karbownik et al. (2020)</b>    | LacidoEnter<br>Dicoflor 60                                               | <i>Saccharomyces boulardii</i> CNCM I - 1079<br><i>Lactobacillus rhamnosus</i> GG (ATCC 53103)                                                                                                                                                                                                                                                                                                                                                                                                                                                  |
| <b>Kato-Kataoka et al. (2016)</b> | Yakult Central Institute                                                 | <i>Lactobacillus casei</i> strain Shirota YIT 9029                                                                                                                                                                                                                                                                                                                                                                                                                                                                                              |
| <b>Kazemi et al. (2019)</b>       | Lallemand Health Solution                                                | <i>Lactobacillus helveticus</i> R0052<br><i>Bifidobacterium longum</i> R0175                                                                                                                                                                                                                                                                                                                                                                                                                                                                    |
| <b>Kelly et al. (2017)</b>        | Alimentary Health Ltd.                                                   | <i>Lactobacillus rhamnosus</i> (JB-1)                                                                                                                                                                                                                                                                                                                                                                                                                                                                                                           |
| <b>Kobayashi et al. (2019)</b>    | Morinaga Milk Industry Co., Ltd.                                         | <i>Bifidobacterium breve</i> A1                                                                                                                                                                                                                                                                                                                                                                                                                                                                                                                 |
| <b>Lew et al. (2019)</b>          | JinHua YinHe Biological Technology Co. Ltd.                              | <i>Lactobacillus plantarum</i> P8                                                                                                                                                                                                                                                                                                                                                                                                                                                                                                               |
| <b>Messaoudi et al. (2011)</b>    | Institut Rosell-Lallemand                                                | <i>Lactobacillus helveticus</i> R0052<br><i>Bifidobacterium longum</i> R0175                                                                                                                                                                                                                                                                                                                                                                                                                                                                    |
| <b>Mohammadi et al. (2016)</b>    | yogurt: Pegah Company<br>capsules: ZistTakhmir Co                        | yogurt: with a total of min $1 \times 10^7$<br><i>Lactobacillus acidophilus</i> LA5<br><i>Bifidobacterium lactis</i> BB12<br>capsules:<br><i>Actobacillus casei</i> $3 \times 10^3$ CFU/g<br><i>Lactobacillus acidophilus</i> $3 \times 10^7$ CFU/g<br><i>Lactobacillus rhamnosus</i> $7 \times 10^9$ CFU/g<br><i>Lactobacillus bulgaricus</i> $5 \times 10^8$ CFU/g<br><i>Bifidobacterium breve</i> $2 \times 10^{10}$ CFU/g<br><i>Bifidobacterium longum</i> $1 \times 10^9$ CFU/g<br><i>Streptococcus thermophilus</i> $3 \times 10^8$ CFU/g |
| <b>Murata et al. (2018)</b>       | LAC - Shield by Morinaga Milk Industry                                   | <i>Lactobacillus paracasei</i> MCC1849                                                                                                                                                                                                                                                                                                                                                                                                                                                                                                          |
| <b>Nishida et al. (2017)</b>      | Correspondence Research & Development Center, Asahi Group Holdings, Ltd. | <i>Lactobacillus gasseri</i> CP2305                                                                                                                                                                                                                                                                                                                                                                                                                                                                                                             |
| <b>Nishida et al. (2019)</b>      | funded by Asahi Group Holdings, Ltd.                                     | <i>Lactobacillus gasseri</i> CP2305                                                                                                                                                                                                                                                                                                                                                                                                                                                                                                             |

|                                         |                                         |                                                                                                                                                                                                                                                                                                                                    |
|-----------------------------------------|-----------------------------------------|------------------------------------------------------------------------------------------------------------------------------------------------------------------------------------------------------------------------------------------------------------------------------------------------------------------------------------|
| <b>Nishihira et al. (2014)</b>          | MegMilk Snow Brand Co. Ltd.             | probiotic group:<br><i>Lactobacillus gasseri</i> SBT2055<br><i>Bifidobacterium longum</i> SBT2928<br>placebo group:<br><i>Streptococcus thermophilus</i><br><i>Lactobacillus delbrueckii subsp. bulgaricus</i>                                                                                                                     |
| <b>Ohsawa et al. (2018)</b>             | funded by Asahi Group Holdings, Ltd.    | <i>Lactobacillus helveticus</i> CM4                                                                                                                                                                                                                                                                                                |
| <b>Östlund-Lagerström et al. (2016)</b> | BioGaia AB                              | <i>Lactobacillus reuteri</i> DSM 17938                                                                                                                                                                                                                                                                                             |
| <b>Papalini et al. (2019)</b>           | Ecologic Barrier                        | <i>Bifidobacterium bifidum</i> W23<br><i>Bifidobacterium lactis</i> W51<br><i>Bifidobacterium lactis</i> W52<br><i>Lactobacillus acidophilus</i> W37<br><i>Lactobacillus brevis</i> W63<br><i>Lactobacillus casei</i> W56<br><i>Lactobacillus salivarius</i> W24<br><i>Lactococcus lactis</i> W19<br><i>Lactococcus lactis</i> W58 |
| <b>Patterson et al. (2020)</b>          | DuPont Nutrition & Biosciences          | <i>Lactocaseibacillus paracasei</i> Lpc-37                                                                                                                                                                                                                                                                                         |
| <b>Rao et al. (2009)</b>                | Yakult                                  | <i>Lactobacillus casei</i> strain Shirota                                                                                                                                                                                                                                                                                          |
| <b>Raygan et al. (2018)</b>             | LactoCare                               | <i>Lactobacillus acidophilus</i><br><i>Lactobacillus reuteri</i><br><i>Lactobacillus fermentum</i><br><i>Bifidobacterium bifidum</i>                                                                                                                                                                                               |
| <b>Raygan et al. (2019)</b>             | LactoCare                               | <i>Lactobacillus acidophilus</i><br><i>Lactobacillus reuteri</i><br><i>Lactobacillus fermentum</i><br><i>Bifidobacterium bifidum</i>                                                                                                                                                                                               |
| <b>Reininghaus (2020)</b>               | OMNi-BiOTiC Stress Repair               | <i>B. bifidum</i> W23<br><i>B. lactis</i> W51<br><i>B. lactis</i> W52<br><i>L. acidophilus</i> W22<br><i>L. casei</i> W56<br><i>L. paracasei</i> W20<br><i>L. plantarum</i> W62<br><i>L. salivarius</i> W24<br><i>L. lactis</i> W19                                                                                                |
| <b>Roman et al. (2018)</b>              | ERGYPHILUS Plus                         | <i>Lactobacillus rhamnosus</i> GG<br><i>Lactobacillus casei</i><br><i>Lactobacillus acidophilus</i><br><i>Bifidobacterium bifidus</i>                                                                                                                                                                                              |
| <b>Romijn et al. (2017)</b>             | Lallemand Health Solution               | <i>Lactobacillus helveticus</i> R0052 (CNCM strain I-1722)<br><i>Bifidobacterium longum</i> R0175 (CNCM strain I-3470)                                                                                                                                                                                                             |
| <b>Rudzki et al. (2019)</b>             | Sanprobi IBS by Probi AB                | <i>Lactobacillus plantarum</i> 299v                                                                                                                                                                                                                                                                                                |
| <b>Sanchez et al. (2017)</b>            | sponsored by the Nestlé Research Center | <i>Lactobacillus rhamnosus</i> CGMCC1.3724                                                                                                                                                                                                                                                                                         |
| <b>Sashihara et al. (2013)</b>          | Meiji Co. Ltd.                          | <i>Lactobacillus gasseri</i> OLL2809                                                                                                                                                                                                                                                                                               |

|                                  |                                                                                                                                                                                                                                       |                                                                                                                                                                                                                                                                                                                                                                                                                                                                                                                      |
|----------------------------------|---------------------------------------------------------------------------------------------------------------------------------------------------------------------------------------------------------------------------------------|----------------------------------------------------------------------------------------------------------------------------------------------------------------------------------------------------------------------------------------------------------------------------------------------------------------------------------------------------------------------------------------------------------------------------------------------------------------------------------------------------------------------|
| <b>Sawada et al. (2017)</b>      | Asahi Group Holdings, Ltd.                                                                                                                                                                                                            | <i>Lactobacillus gasseri</i> CP2305                                                                                                                                                                                                                                                                                                                                                                                                                                                                                  |
| <b>Severance et al. (2017)</b>   | Bifiform Balance                                                                                                                                                                                                                      | <i>Lactobacillus rhamnosus</i> strain GG<br><i>Bifidobacterium animalis</i> subsp. <i>lactis</i> Bb12                                                                                                                                                                                                                                                                                                                                                                                                                |
| <b>Shinkai et al. (2013)</b>     | Faculty of applied Bioscience, Tokyo University of Agriculture providing lactic acid bacteria, study conducted under the contract of the Tokyo Metropolitan Institute of Gerontology (TMIG) and Otsuka Pharmaceutical Company Limited | <i>Lactobacillus pentosus</i> strain b240                                                                                                                                                                                                                                                                                                                                                                                                                                                                            |
| <b>Steenbergen et al. (2015)</b> | Ecologic Barrier by Winclove                                                                                                                                                                                                          | <i>Bifidobacterium bifidum</i> W23<br><i>Bifidobacterium lactis</i> W52<br><i>Lactobacillus acidophilus</i> W37<br><i>Lactobacillus brevis</i> W63<br><i>Lactobacillus casei</i> W56<br><i>Lactobacillus salivarius</i> W24<br><i>Lactococcus lactis</i> (W19 and W58)                                                                                                                                                                                                                                               |
| <b>Takada et al. (2016)</b>      | Yakult Central Institute                                                                                                                                                                                                              | <i>Lactobacillus casei</i> YIT 9029                                                                                                                                                                                                                                                                                                                                                                                                                                                                                  |
| <b>Takada et al. (2017)</b>      | Yakult Central Institute                                                                                                                                                                                                              | <i>Lactobacillus casei</i> strain Shirota YIT 9029                                                                                                                                                                                                                                                                                                                                                                                                                                                                   |
| <b>Tillisch et al. (2013)</b>    | Danone Research facilities                                                                                                                                                                                                            | <i>Bifidobacterium animalis</i> subsp <i>lactis</i> CNCM strain number I-2494 -> 1,25x10 <sup>10</sup> CUF/cup <i>Streptococcus thermophilus</i> CNCM strain number I-1630 -> 1,2x10 <sup>9</sup> CFU/cup<br><i>Lactobacillus bulgaricus</i> CNCM strain numbers I-1632 and I-1519 -> 1,2x10 <sup>9</sup> CFU/cup <i>Lactococcus lactis</i> subsp <i>lactis</i> CNCM strain number I-1631                                                                                                                            |
| <b>Tran et al. (2019)</b>        | "commercially available as over - the - counter products (e.g., Amazon)"                                                                                                                                                              | <i>Bifidobacterium</i> :<br><i>B. lactis</i><br><i>B. bifidum</i><br><i>B. breve</i><br><i>B. longum</i><br><i>B. infantis</i><br><i>B. adolescentis</i><br><i>Lactobacillus</i> :<br><i>L. acidophilus</i><br><i>L. brevis</i><br><i>L. bulgaricus</i><br><i>L. casei</i><br><i>L. paracasei</i><br><i>L. plantarum</i><br><i>L. salivarius</i><br><i>L. rhamnosus</i><br><i>L. fermentum</i><br><i>L. gasseri</i><br><i>L. helveticus</i><br><i>L. reuteri</i><br><i>L. crispatus</i><br><i>Lactococcus lactis</i> |



|                               |                                                     |                                                                    |
|-------------------------------|-----------------------------------------------------|--------------------------------------------------------------------|
|                               |                                                     | <i>Streptococcus thermophilus</i><br><i>Bacillus coagulans</i>     |
| <b>Wang et al. (2019)</b>     | Alimentary Health Group                             | <i>Bifidobacterium longum</i> 1714                                 |
| <b>Xiao et al. (2020)</b>     | Morinaga Culture Collection, Zama, Japan            | <i>Bifidobacterium breve</i> A1 MCC1274                            |
| <b>Yamamura et al. (2009)</b> | NR                                                  | <i>Lactobacillus helveticus</i> strain CM4                         |
| <b>Zhang et al. (2021)</b>    | manufactured by Yakult Corporation, Shanghai, China | <i>Lactocaseibacillus paracasei</i> YIT 9029 (strain Shirota: LcS) |

NR: not reported; CFU: Colony forming unit

**Table S2. Questionnaires and Tests applied by the included studies.**

| Abbreviation | Description                                         |
|--------------|-----------------------------------------------------|
| ACQ-R        | Anxiety control questionnaire-revised               |
| ADS          | Allgemeine Depressionsskala                         |
| APL          | Everyday Problem List                               |
| APT          | Attention and Perceptivity Test                     |
| BAI          | Beck Anxiety Inventory                              |
| BAS          | Behavioural Approach Scale                          |
| BDI          | Beck Depression Inventory score                     |
| BDI II       | Beck Depression Inventory score II                  |
| BIS          | Behavioural Inhibition Scale                        |
| BPRS         | Brief Psychiatric Rating Scale                      |
| BUT          | Body Uneasiness Test                                |
| CANTAB       | Cambridge Neuropsychological Test Automated Battery |
| CBB          | CogState Brief Battery                              |
| CBG          | Cyberball stress - social stress                    |
| CCL          | Coping Checklist                                    |
| CVLT         | California Verbal Learning Test                     |
| DASS-42      | Depression, Anxiety and Stress Scale questionnaire  |
| DST          | Digit Span Test                                     |
| DVT          | Digit Vigilance Test                                |
| EAT - 26     | Eating Attitudes Test - 26                          |
| ECG          | Electrocardiogram                                   |
| EDI-2        | Eating Disorder Inventory 2                         |
| EDR          | Electrodermal Responses                             |
| EEG          | Electroencephalogram                                |
| EMG          | Electromyogram                                      |
| EOG          | Electrooculogram                                    |
| EPDS         | Edinburgh Postnatal Depression Scale                |
| ESS          | Epworth Sleepiness Scale                            |
| GAD-7        | Generalised Anxiety Disorder - 7 (anxiety score)    |
| GAF          | Global Assessment of Functioning                    |
| GDS - SF     | geriatric depression scale - short form             |
| GHQ-28       | 28item General Health Questionnaire                 |
| GLQI         | Gastrointestinal Quality of life questionnaire      |
| GSI          | Global Severity Index                               |

|           |                                                                    |
|-----------|--------------------------------------------------------------------|
| HADS      | Hospital Anxiety and Depression Scale                              |
| HAM-A     | Hamilton Anxiety Rating Scale                                      |
| HAM-D 17  | Hamilton Depression Rating                                         |
| HDI       | Henry Ford Hospital Headache Disability Inventory                  |
| HSCL-90   | Hopkins Symptom Checklist                                          |
| IBS - SSS | Irritable Bowel Syndrome Severity Scale                            |
| ICGI      | Improved Clinical Global Impressions scale                         |
| IGT       | Iowa Gambling Task                                                 |
| ISI       | Insomnia Severity Index                                            |
| JMCIS     | Japanese version of the MCI Screen                                 |
| LEIDS     | Leiden index of depression severity                                |
| MAAS      | Maternal Antenatal Attachment Scale                                |
| MADRS     | Montgomery-Åsberg Depression Rating Scale                          |
| MIDAS     | Migraine Disability Assessment Scale                               |
| MMSE      | Mini - Mental State Examination                                    |
| MoCA-J    | Japanese version of the Montreal Cognitive Assessment instrument   |
| MPAS      | Maternal Postnatal Attachment Scale                                |
| MQ        | Mood Questionnaire                                                 |
| MSS       | Mania Self Rating Scale                                            |
| NART      | National Adult Reading Test                                        |
| NEO - FFI | NEO - Five - Factor Inventory                                      |
| NMR       | Negative mood regulation                                           |
| NTS       | Need Threat Scale                                                  |
| OSA       | Oguri-Shirakawa-Azumi sleep inventory                              |
| PAL       | Paired Associate Learning test                                     |
| PANAS     | Positive And Negative Affect Schedule                              |
| PES       | Pregnancy Experience Scale                                         |
| PHQ-9     | Patient Health Questionnaire -9 (depression score)                 |
| POMS      | Profile of Mood States                                             |
| PRAQ - R  | Pregnancy related Anxiety Questionnaires - Revised                 |
| PSDI      | Positive Symptom Distress Index                                    |
| PSQI      | Pittsburgh Sleep Quality Index                                     |
| PSS       | Perceived Stress Scale                                             |
| PST       | Positive Symptom Total                                             |
| PSWQ      | Penn state worry questionnaire                                     |
| QIDS-SR16 | Quick Inventory of Depressive Symptomatology                       |
| RBANS     | Repeatable Battery for the Assessment of Neuropsychological Status |
| RFFT      | Ruff Figural Fluency Test                                          |
| RVIP      | Rapid Visual Information - Processing Task                         |
| SCID - I  | Semi - Structured - Interview                                      |
| SCL-90    | Symptoms Checklist-90                                              |
| SCL90R    | Symptom Checklist - Revised                                        |
| SECPT     | Socially Evaluated Cold Pressure Test                              |
| SEP       | Subjective "Exclusion Perception"                                  |
| SF-36     | Short Form Health Survey                                           |
| SHRI      | Sleep Health Risk Index                                            |
| SRT       | Story Recall Test                                                  |
| ST        | Stroop Colour - Word Test                                          |
| STAI      | State Trait Anxiety Inventory                                      |
| TICS      | Trier Inventory for Chronic Stress                                 |
| TMT       | Trail Making Test parts A and B                                    |

|                  |                                     |
|------------------|-------------------------------------|
| TSST             | Trier Social Stress Test            |
| VLT              | Verbal Learning Test                |
| WHO - QOL - BREF | WHO - Quality of Life Questionnaire |
| YMRS             | Young Mania Rating Scale            |
| Zung - SDS       | Zung Self-rating Depression Scale   |

**Table S3. Study characteristics across studies.**

|                                   |                    | <b>all trials (n=54)</b> | <b>trials in meta-analysis (n=30)</b> |
|-----------------------------------|--------------------|--------------------------|---------------------------------------|
| <b>Sample size</b>                |                    |                          |                                       |
| <b>Sample randomized</b>          |                    |                          |                                       |
|                                   | Sum                | 4449                     | 3017                                  |
|                                   | Mean               | 82.4                     | 100.6                                 |
|                                   | Median             | 63                       | 77                                    |
|                                   | Minimum            | 20                       | 39                                    |
|                                   | Maximum            | 300                      | 300                                   |
|                                   | IQR                | 40.8-96.5                | 50.5-117.5                            |
| <b>Sample at the end of trial</b> |                    |                          |                                       |
|                                   | Sum                | 3700                     | 2563                                  |
|                                   | Mean               | 78.7                     | 91.5                                  |
|                                   | Median             | 60                       | 64.5                                  |
|                                   | Minimum            | 19                       | 31                                    |
|                                   | Maximum            | 278                      | 278                                   |
|                                   | IQR                | 42-93                    | 52.3-101                              |
| <b>Sample analysed</b>            |                    |                          |                                       |
|                                   | Sum                | 4130                     | 2595                                  |
|                                   | Mean               | 76.5                     | 96.1                                  |
|                                   | Median             | 60                       | 69                                    |
|                                   | Minimum            | 19                       | 31                                    |
|                                   | Maximum            | 294                      | 294                                   |
|                                   | IQR                | 40-93.5                  | 50.5-113.5                            |
| <b>NR</b>                         |                    | 7                        | 2                                     |
| <b>No dropouts/NA</b>             |                    | 6                        | 4                                     |
| <b>Age</b>                        |                    |                          |                                       |
|                                   | Mean (SD)          | 42.7 (20)                | 42.2 (20.6)                           |
|                                   | Median             | 35.6                     | 36.2                                  |
|                                   | IQR                | 24.9-50.1                | 22.8-51.4                             |
|                                   | Minimum            | 18                       | 18                                    |
|                                   | Maximum            | 98                       | 98                                    |
|                                   | NR                 | 3                        | 0                                     |
| <b>Sex</b>                        |                    |                          |                                       |
| <b>Female</b>                     |                    |                          |                                       |
|                                   | Number             | 2473                     | 1723                                  |
|                                   | Percentage         | 60.1%                    | 62.9%                                 |
|                                   | Trials only female | 4                        | 2                                     |
| <b>Male</b>                       |                    |                          |                                       |
|                                   | Number             | 1641                     | 1017                                  |

|                            |                             |                                           |                                         |
|----------------------------|-----------------------------|-------------------------------------------|-----------------------------------------|
|                            | Percentage                  | 39.9%                                     | 37.1%                                   |
|                            | Trials only male            | 5                                         | 1                                       |
| <b>Continent</b>           |                             |                                           |                                         |
|                            | Europe (n; %)               | 18; 33.3%                                 | 10; 33.3%                               |
|                            | Asia (n; %)                 | 28; 51.9%                                 | 18; 60%                                 |
|                            | America (n; %)              | 7; 12%                                    | 2; 6,7%                                 |
|                            | Oceania (n; %)              | 1; 1.9%                                   | 0                                       |
| <b>Country</b>             |                             |                                           |                                         |
|                            | Japan (n; %)                | 15; 27.8%                                 | 9; 30%                                  |
|                            | Iran (n; %)                 | 7; 13.5%                                  | 6; 20%                                  |
|                            | USA (n; %)                  | 5; 9.6%                                   | 0                                       |
| <b>Date (Years)</b>        |                             |                                           |                                         |
|                            | Range                       | 2007 - 2021                               | 2011- 2021                              |
|                            | Most (%)                    | 2019 (22.2%)                              | 2016, 2019, 2020 (each 16.7%)           |
| <b>Intake Time (Weeks)</b> |                             |                                           |                                         |
|                            | Total                       | 484                                       | 279                                     |
|                            | Mean                        | 9                                         | 9.3                                     |
|                            | Median                      | 8                                         | 8                                       |
|                            | IQR                         | 4-12                                      | 4.3-12                                  |
|                            | Range                       | 3 - 24                                    | 4 – 24                                  |
|                            | Most (%)                    | 4, 8 (each 24.1%)                         | 4, 8 (26.7%)                            |
| <b>Strain numbers</b>      |                             |                                           |                                         |
|                            | Total (Strains)             | 167                                       | 105                                     |
|                            | Mean                        | 3.1                                       | 3.5                                     |
|                            | Median                      | 1                                         | 1                                       |
|                            | Minimum                     | 1                                         | 1                                       |
|                            | Maximum                     | 20                                        | 20                                      |
|                            | IQR                         | 1-4                                       | 1-4                                     |
|                            | Most (%)                    | 1 (53.7%)                                 | 1 (53.3%)                               |
| <b>CFU</b>                 |                             |                                           |                                         |
|                            | Total                       | 9.9 x 10 <sup>11</sup>                    | 5.9 x 10 <sup>11</sup>                  |
|                            | Mean                        | 2 x 10 <sup>10</sup>                      | 2.3 x 10 <sup>10</sup>                  |
|                            | Median                      | 1 x 10 <sup>10</sup>                      | 9 x 10 <sup>9</sup>                     |
|                            | Min                         | 2.3 x 10 <sup>7</sup>                     | 2.4 x 10 <sup>7</sup>                   |
|                            | Max                         | 1.4 x 10 <sup>11</sup>                    | 1.4 x 10 <sup>11</sup>                  |
|                            | IQR                         | 2.5x10 <sup>9</sup> -2.1x10 <sup>10</sup> | 3.5x10 <sup>9</sup> -2x10 <sup>10</sup> |
|                            | NR                          | 5 (9.3%)                                  | 4 (13.3%)                               |
| <b>Application</b>         |                             |                                           |                                         |
|                            | Capsules (n; %)             | 13; 24.1%                                 | 6; 26.7%                                |
|                            | Tablets/pills (n; %)        | 7; 13%                                    | 5; 16.7%                                |
|                            | Liquids/Yoghurt (n; %)      | 12; 22.2%                                 | 7; 23.3%                                |
|                            | Powder/Sachet/Sticks (n; %) | 19; 35.2%                                 | 8; 26.7%                                |
|                            | NR (n; %)                   | 3; 5.6%                                   | 2; 6.7%                                 |
| <b>Daily Intake</b>        |                             |                                           |                                         |
|                            | 1/day (n; %)                | 46; 85.2%                                 | 24; 80%                                 |
|                            | 2/day (n; %)                | 3; 5.6%                                   | 3; 10%                                  |

|              |         |         |
|--------------|---------|---------|
| 3/day (n; %) | 3; 5.6% | 1; 3.3% |
| 4/day (n; %) | 2; 3.7% | 2; 6.7% |

n: number; SD: standard deviation; IQR: interquartile range; NR: not reported; CFU: colony forming unit

**Table S4. Overview of the most used questionnaires and their results of all included studies.**

[illegible]

|                             |    |    |    |    |    |    |    |    |    |    |    |    |    |    |    |    |    |
|-----------------------------|----|----|----|----|----|----|----|----|----|----|----|----|----|----|----|----|----|
| Eskandarzadeh et al. (2021) | ↔  | NR | NR | NR | NR | NR | ↓↓ | NR | ↓  | ↔  |
| Ghaderi et al. (2019)       | NR | ↓↓ | NR |
| Gualtieri et al. (2020)     | NR | NR | NR | NR | NR | NR | ↓↓ | NR | ↔  | NR | NR |
| Ho et al. (2021)            | ↔  | ↓  | NR | ↔  | NR | NR | NR | NR | NR |
| Hwang et al. (2019)         | NR |
| Inoue et al. (2018)         | NR |
| Karbownik et al. (2020)     | NR | ↔  | ↔  |
| Kato-Kataoka et al. (2016)  | NR | ↔  | ↔  |
| Kazemi et al. (2019)        | NR | ↓  | NR |
| Kelly et al. (2017)         | ↔  | ↔  | NR | ↔  | ↔  | NR | ↔  | ↔  | ↔  |
| Kobayashi et al. (2019)     | NR | ↔  | NR | NR | NR |
| Lew et al. (2019)           | NR | NR | ↓  | NR | ↔  | NR | NR | NR | NR |
| Messaoudi et al. (2011)     | NR | NR | NR | NR | ↔  | ↔  | NR | NR | NR | NR | NR | NR | ↔  | NR | ↓  | NR | NR |

|                                  |    |    |    |    |    |    |    |    |    |    |    |    |    |    |    |    |    |    |
|----------------------------------|----|----|----|----|----|----|----|----|----|----|----|----|----|----|----|----|----|----|
| Mohammadi et al. (2016)          | NR | NR | ↔  | ↔  | NR |
| Murata et al. (2018)             | NR | ↔  | NR |
| Nishida et al. (2017)            | NR | NR | NR | ↔  | ↔  | ↔  | NR | NR | NR | NR | NR | ↔  | NR | NR | NR | ↔  | ↔  |    |
| Nishida et al. (2019)            | NR | NR | NR | ↔  | NR | ↔  | ↔  | NR | NR | NR | NR | ↓  | NR | NR | NR | ↔  | ↓  |    |
| Nishihira et al. (2014)          | NR | NR | NR | ↔  | NR |
| Ohsawa et al. (2018)             | NR | ↔  | NR | NR | ↔  | NR | NR | NR | NR |
| Östlund-Lagerström et al. (2016) | NR | NR | NR | NR | ↔  | ↔  | NR | NR | NR | NR | NR | NR | ↔  | NR | NR | NR | NR | NR |
| Papalini et al. (2019)           | NR | ↔  | NR | NR | NR | NR | NR | NR | ↔  | NR |
| Patterson et al. (2020)          | ↔  | NR | ↔  | NR | ↔  | NR | NR | ↔  | ↔  |    |
| Rao et al. (2009)                | ↓  | ↔  | NR |
| Raygan et al. (2018)             | ↓↓ | ↓↓ | NR | ↓↓ | NR |
| Raygan et al. (2019)             | ↓  | ↓↓ | NR | ↔  | NR | NR | NR | NR | NR | NR |



[illegible]

|                           |    |    |    |    |    |    |    |    |    |    |    |    |    |     |    |    |    |
|---------------------------|----|----|----|----|----|----|----|----|----|----|----|----|----|-----|----|----|----|
| Tran et al.<br>(2019)     | ↔  | NR  | NR | NR | NR |
| Wang et al.<br>(2019)     | NR  | NR | NR | NR |
| Xiao et al.<br>(2020)     | NR | ↑↑↑ | NR | NR | NR |
| Yamamura et<br>al. (2009) | NR  | NR | NR | NR |
| Zhang et al.<br>(2021)    | NR  | NR | NR | NR |

A summary of the raw data as direction of change of the applied questionnaires are presented. It is questionnaire specific whether or not a decrease implies improvement or deterioration and accordingly, whether or not an increase implies improvement or deterioration. ↔: no significant differences between the groups; ↓: significant decrease p<0.05; ↓↓: significant decrease p<0.01; ↓↓↓: significant decrease p<0.001; ↑: significant increase p<0.05; ↑↑: significant increase p<0.01; ↑↑↑: significant increase p<0.001; NR: not reported; BAI: Beck Anxiety Inventory; BDI: Beck Depression Inventory; DASS-42: Depression, Anxiety and Stress Scale ; GHQ: General Health Questionnaire ; HADS-A/-D: Hospital Anxiety and Depression Scale; HAM-A: Hamilton Anxiety Rating Scale; HAM-D: Hamilton Depression Rating Scale ; LEIDs: Leiden index of depression severity; POMS: Profile of Mood States; PSQI: Pittsburgh Sleep Quality Index; PSS: Perceived Stress Scale; RBANS: Repeatable Battery for the Assessment of Neuropsychological Status; SCL90: Symptoms Checklist-90; STAI: State Trait Anxiety Inventory

**Table S5. Study Outcomes at qualitative level for the most used questionnaires of the studies included in the meta-analysis.**

| Author                    | Year | Anxiety    |            |     | Depression |       |     |        |       | Psychiatric Distress |              | Mood | Stress |
|---------------------------|------|------------|------------|-----|------------|-------|-----|--------|-------|----------------------|--------------|------|--------|
|                           |      | STAI state | STAI trait | BAI | HADS-A     | HAM-A | BDI | HADS-D | HAM-D | GHQ (total)          | SCL-90 (GSI) | POMS | PSS    |
| Akkasheh et al.           | 2016 |            |            |     |            |       | ↓   |        |       |                      |              |      |        |
| Chung, Y.C. et al.        | 2014 |            |            |     |            |       |     |        |       |                      |              |      | ↔      |
| Eskandarzadeh et al.      | 2021 | ↓          | ↔          | ↔   |            | ↓↓    |     |        |       |                      |              |      |        |
| Gualtieri et al.          | 2021 |            |            |     |            | ↓↓    |     |        |       |                      | ↔            |      |        |
| Ho et al.                 | 2021 |            |            | ↔   |            |       | ↓   |        |       |                      |              |      |        |
| Karbownik et al.          | 2020 | ↔          | ↔          |     |            |       |     |        |       |                      |              |      |        |
| Kato-Kataoka et al.       | 2016 | ↔          | ↔          |     |            |       |     |        |       |                      |              |      |        |
| Kazemi et al.             | 2020 |            |            |     |            |       | ↓   |        |       |                      |              |      |        |
| Messaoudi et al.          | 2011 |            |            |     | ↔          |       |     | ↔      |       |                      | ↓            |      | ↔      |
| Mohammadi et al.          | 2016 |            |            |     |            |       |     |        |       | ↔                    |              |      |        |
| Murata, M. et al.         | 2018 |            |            |     |            |       |     |        |       |                      |              | ↔    |        |
| Nishida et al.            | 2019 | ↔          | ↓          |     | ↔          |       |     | ↔      |       | ↔                    |              |      |        |
| Nishihira et al.          | 2014 |            |            |     |            |       |     |        |       | ↔                    |              |      |        |
| Ohsawa, K. et al.         | 2018 |            |            |     |            |       |     |        |       |                      |              | ↔    |        |
| Östlund-Lagerström et al. | 2016 |            |            |     | ↔          |       |     | ↔      |       |                      |              |      | ↔      |
| Papalini et al.           | 2019 |            |            |     |            |       | ↔   |        |       |                      |              |      |        |
| Patterson et al.          | 2020 | ↔          |            | ↔   |            |       |     |        |       |                      |              |      | ↔      |
| Raygan et al.             | 2019 |            |            | ↓   |            |       | ↓↓  |        |       |                      |              |      |        |
| Raygan et al.             | 2018 |            |            | ↓↓  |            |       | ↓↓  |        |       | ↓↓                   |              |      |        |
| Reininghaus et al.        | 2020 |            |            |     |            |       | ↔   |        | ↔     |                      | ↔            |      |        |
| Roman et al.              | 2018 | ↔          | ↔          |     |            |       | ↔   |        |       |                      |              |      |        |
| Rudzki et al.             | 2019 |            |            |     |            |       |     |        | ↔     |                      | ↔            |      |        |
| Sanchez et al.            | 2017 | ↔          | ↔          |     |            |       | ↓   |        |       |                      |              |      | ↔      |
| Sashihara, T. et al.      | 2013 |            |            |     |            |       |     |        |       |                      |              | ↔    |        |
| Shinkai et al.            | 2013 |            |            |     |            |       |     |        |       |                      |              | ↔    |        |
| Steenbergen et al.        | 2015 |            |            | ↔   |            |       | ↔   |        |       |                      |              |      |        |
| Takada et al.             | 2016 | ↔          | ↔          |     |            |       |     |        |       |                      |              |      |        |
| Takada et al.             | 2017 | ↔          | ↔          |     |            |       |     |        |       | ↔                    |              |      |        |
| Tran et al.               | 2019 |            |            | ↔   |            |       |     |        |       |                      |              |      |        |
| Zhang et al.              | 2021 |            |            |     |            |       | ↔   |        | ↔     |                      |              |      |        |

A summary of the raw data as direction of change of the applied questionnaires are presented. It is questionnaire specific whether or not a decrease implies improvement or deterioration and accordingly, whether or not an increase implies improvement or deterioration.

↔: no significant differences between the groups; ↓: significant decrease  $p < 0.05$ ; ↓↓: significant decrease  $p < 0.01$ ; ↓↓↓: significant decrease  $p < 0.001$ ; BAI: Beck Anxiety Inventory; BDI: Beck Depression Inventory; GHQ: General Health Questionnaire ; HADS-A/-

D: Hospital Anxiety and Depression Scale; HAM-A: Hamilton Anxiety Rating Scale; HAM-D: Hamilton Depression Rating Scale; POMS: Profile of Mood States; PSS: Perceived Stress Scale; SCL90: Symptoms Checklist-90; STAI: State Trait Anxiety Inventor

**Figure S1. Effect of intake period on Anxiety of randomized controlled trials receiving either probiotics or placebo treatment.**

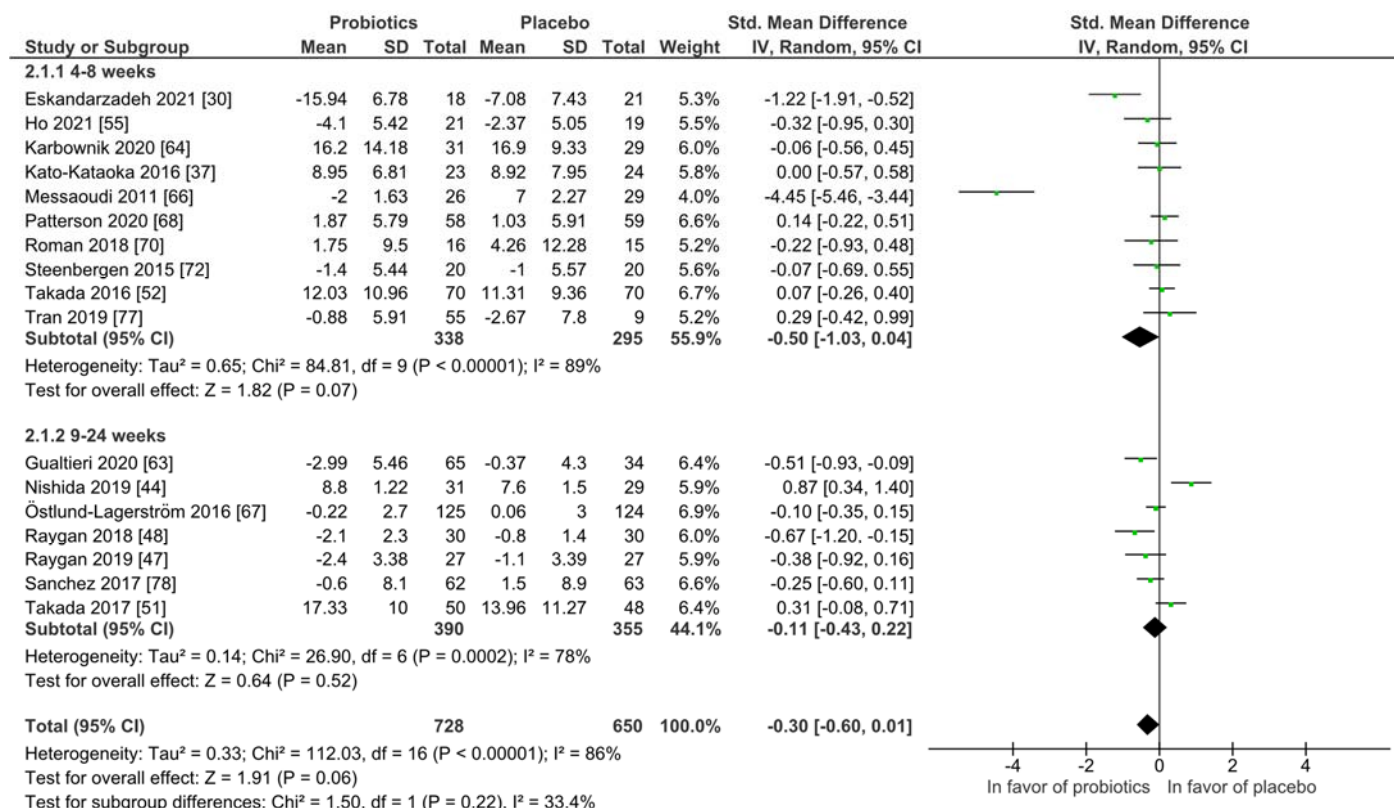

**Figure S2. Effect of single-strain versus multi-strain probiotics on Anxiety in randomized controlled trials receiving either probiotics or placebo treatment.**

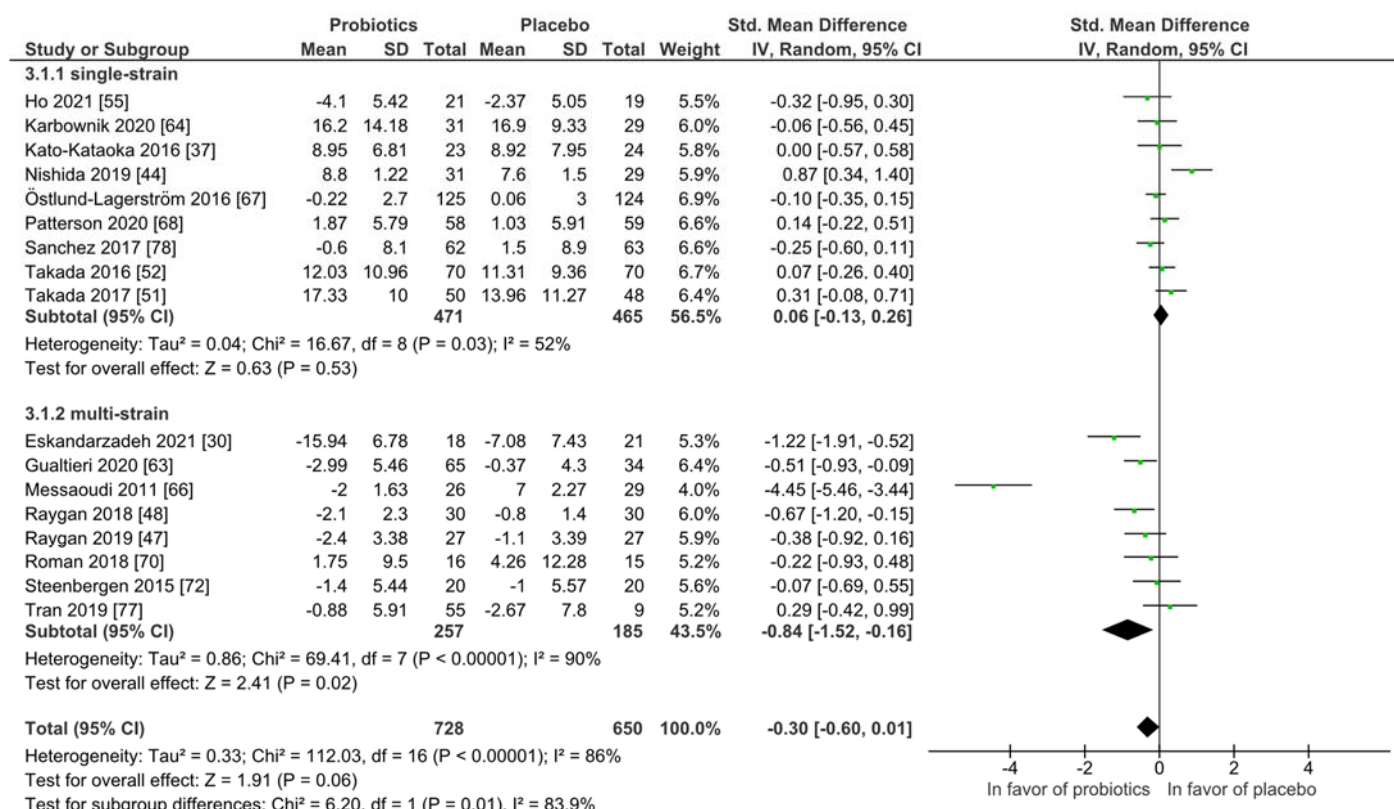

**Figure S3. Effect of studies from Asia versus studies from Europe on Anxiety in randomized controlled trials receiving either probiotics or placebo treatment.**

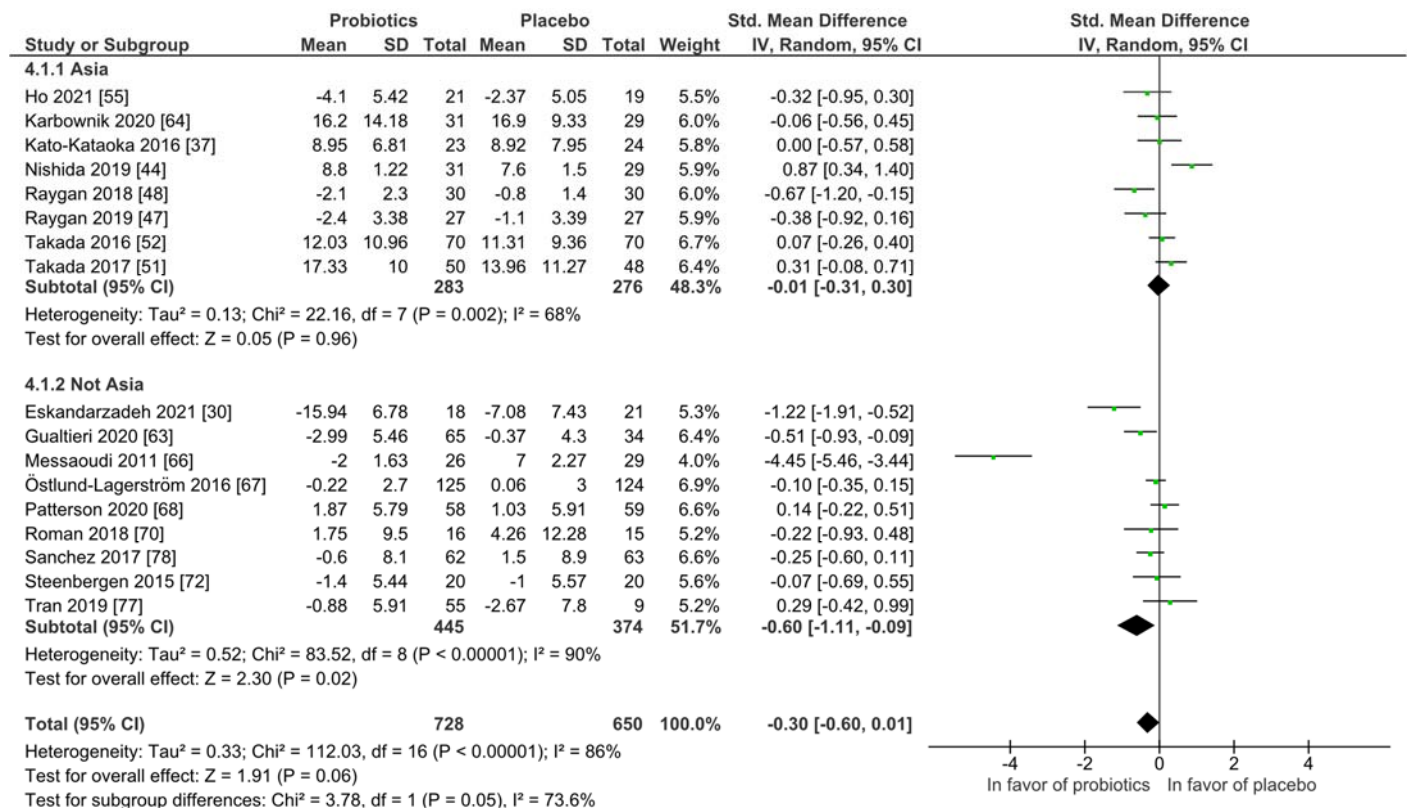

**Figure S4. Effect of application form on Anxiety of randomized controlled trials receiving either probiotics or placebo treatment.**

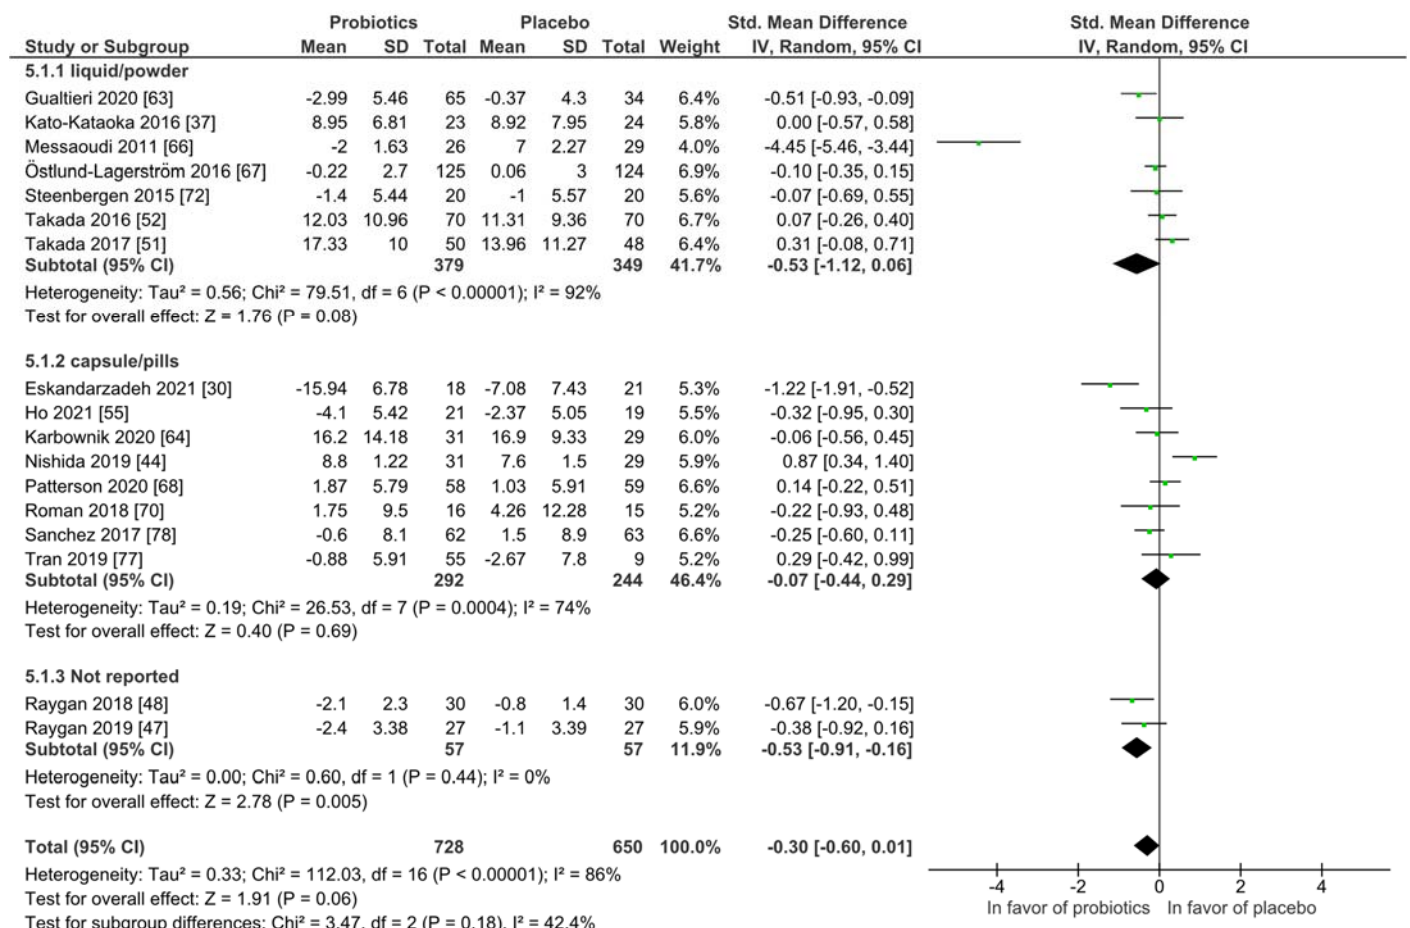

**Figure S5. Effect of studies with healthy participants on Anxiety in randomized controlled trials receiving either probiotics or placebo treatment.** Only one study included patients with diagnosed anxiety so that no subgroup-analysis could be conducted for the patient group.

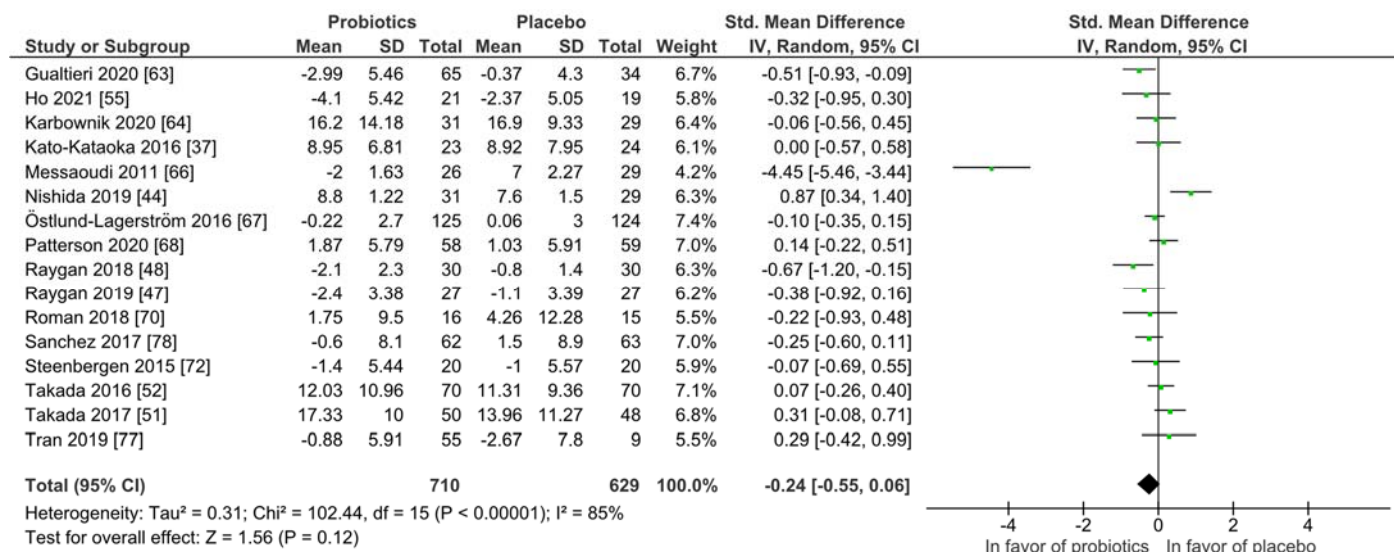

**Figure S6. Overview of Anxiety symptom outcomes according to questionnaire.** Since several studies incorporated more than one questionnaire for the same outcome, no total summary across all questionnaires is presented here.

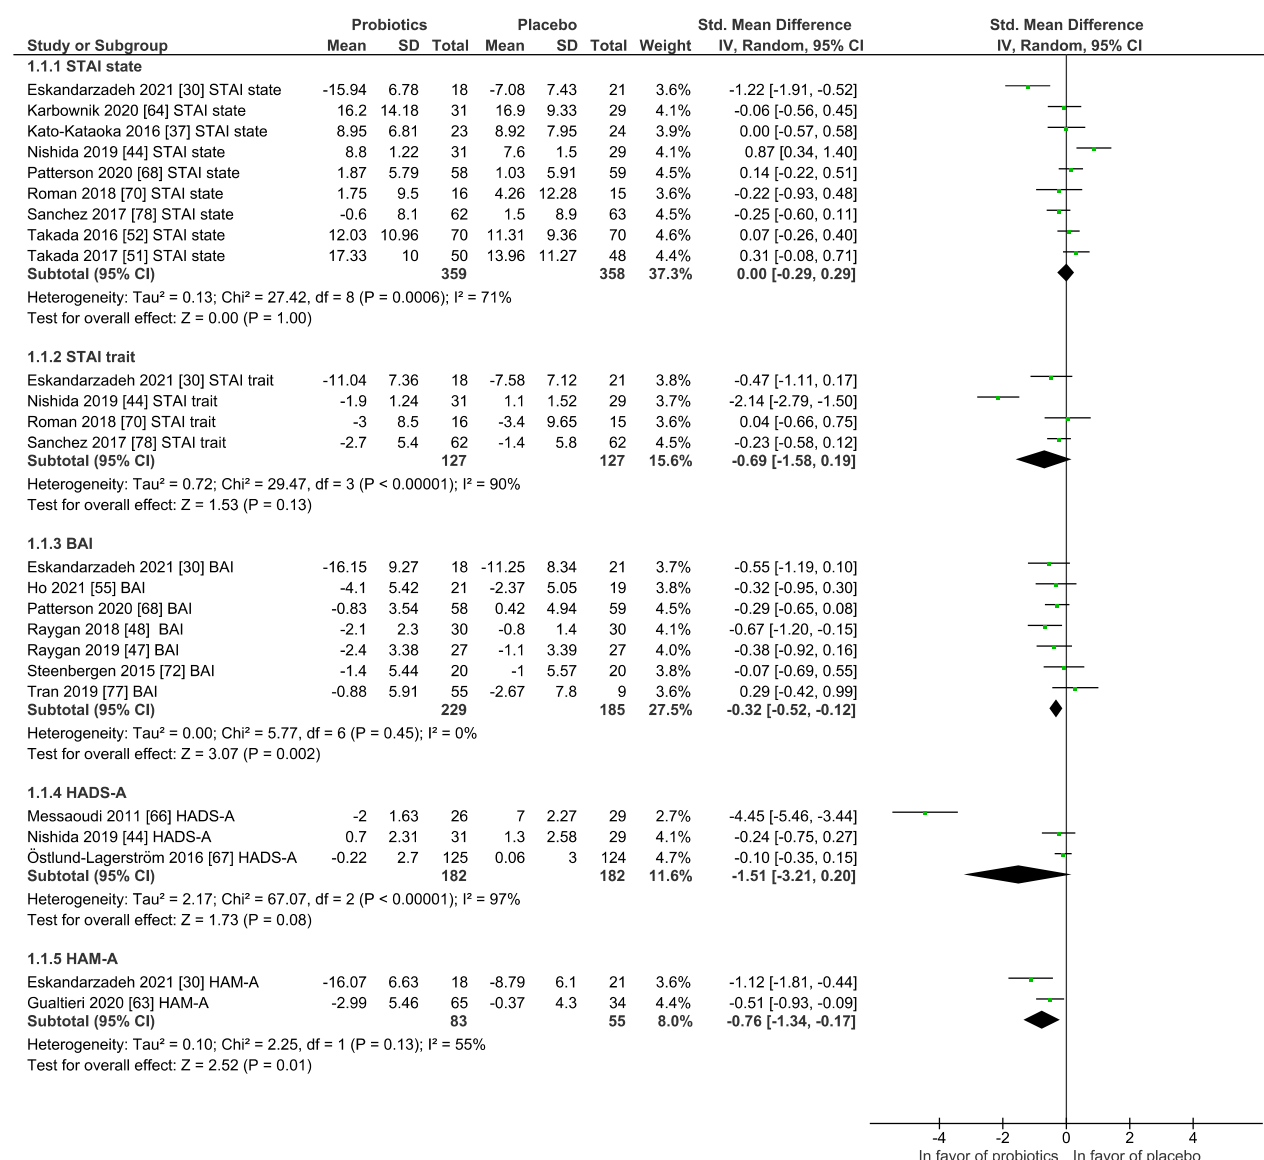



**Figure S7. Effect of intake period on Depression of randomized controlled trials receiving either probiotics or placebo treatment.**

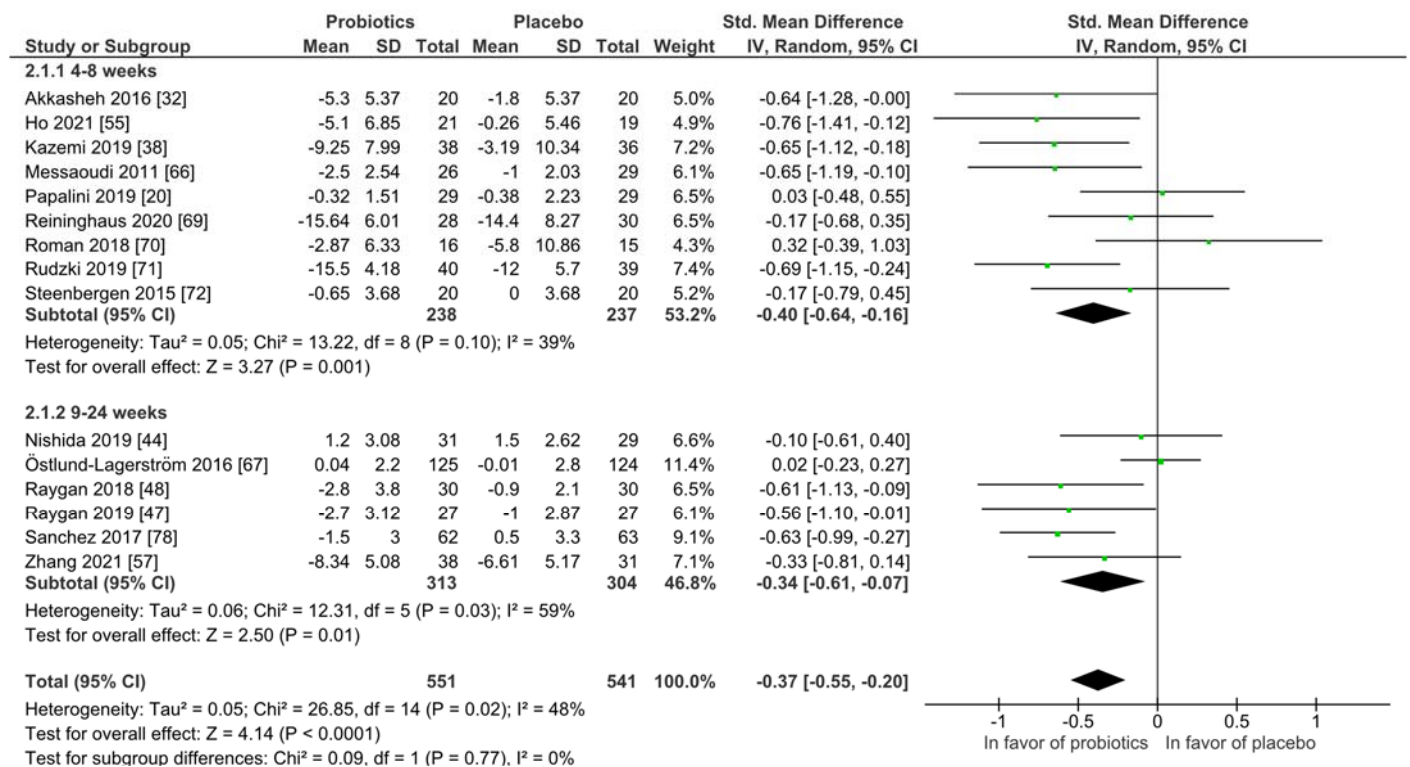

**Figure S8. Effect of single-strain versus multi-strain probiotics on Depression in randomized controlled trials receiving either probiotics or placebo treatment.**

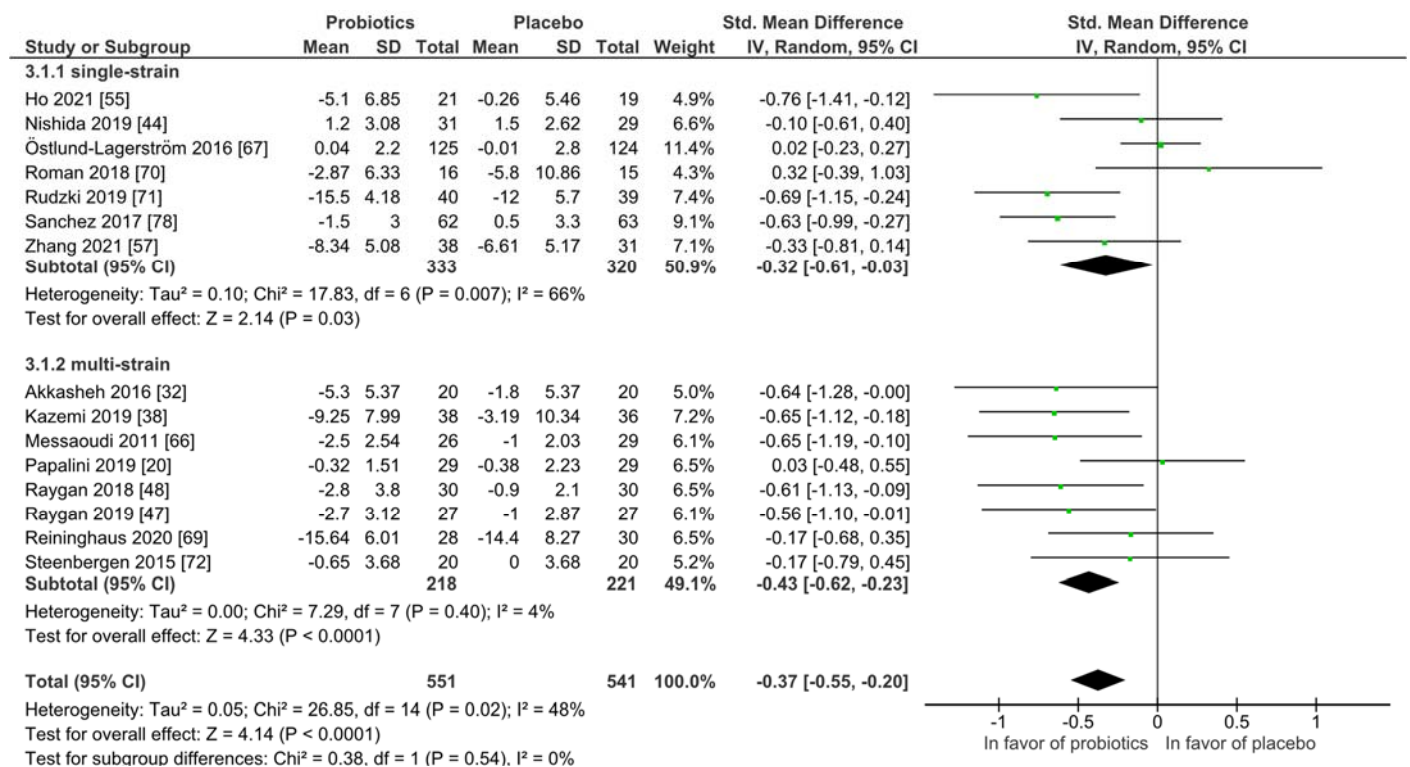

**Figure S9. Effect of studies from Asia versus studies from Europe on Depression in randomized controlled trials receiving either probiotics or placebo treatment.**

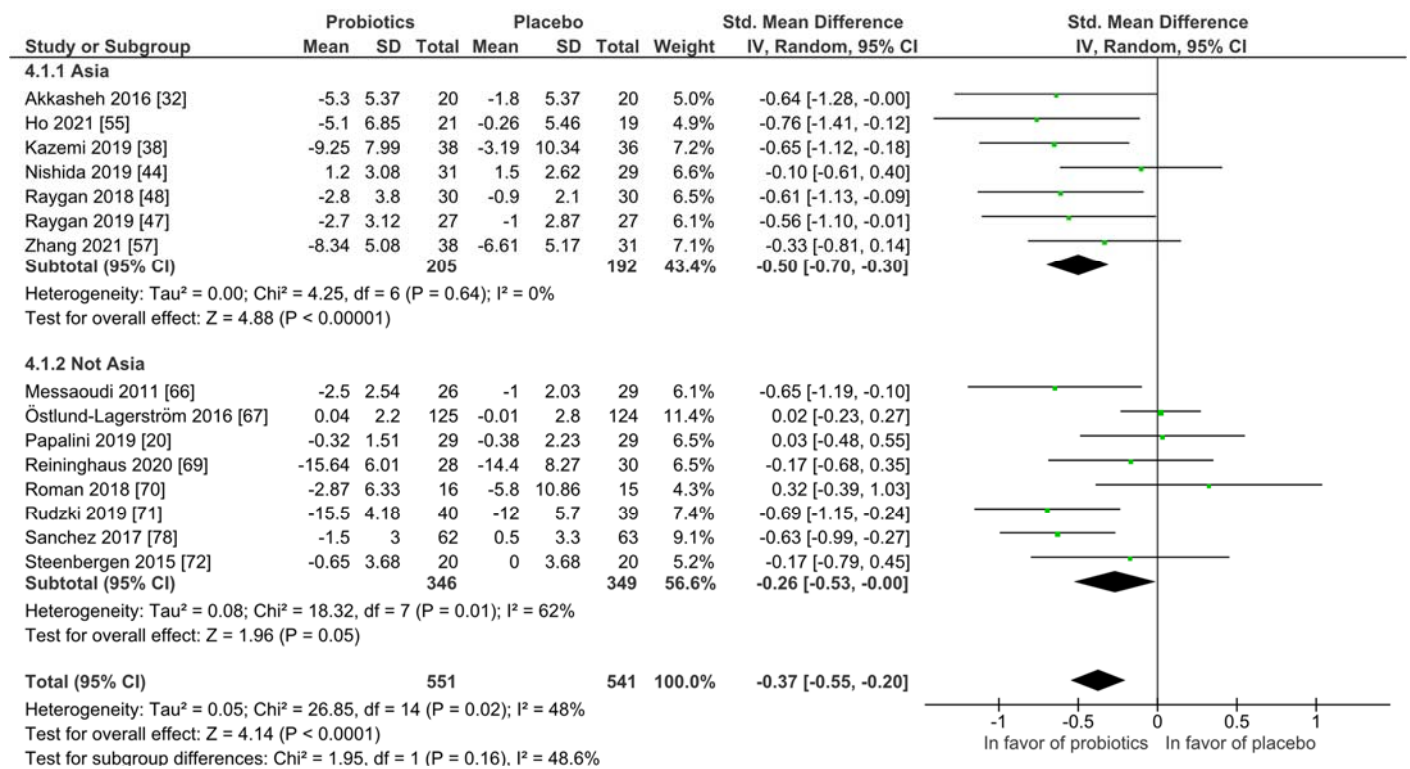

**Figure S10. Effect of application form on Depression of randomized controlled trials receiving either probiotics or placebo treatment.**

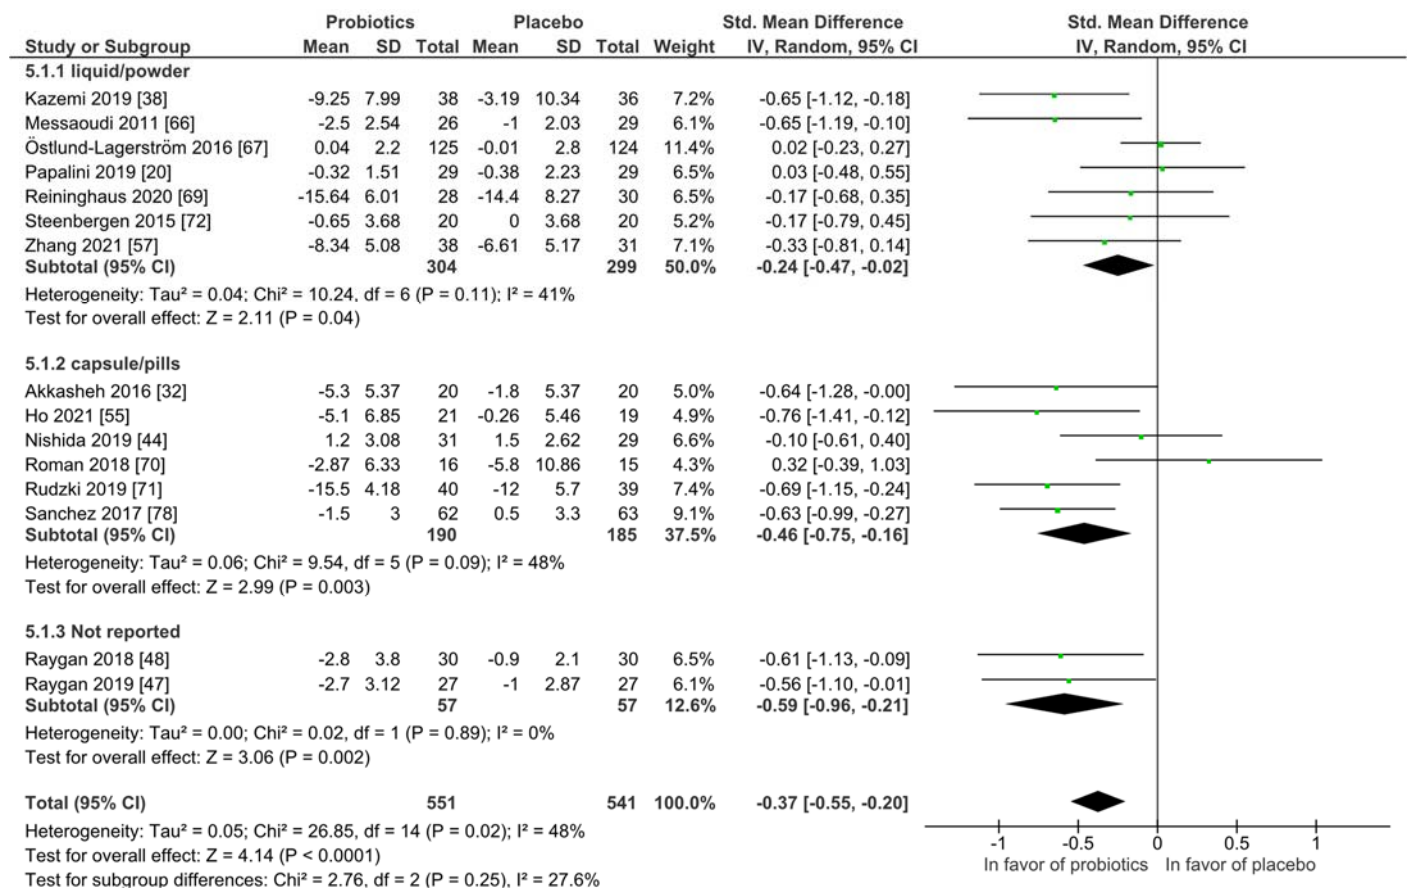



**Figure S11. Effect of studies with healthy participants on Depression in randomized controlled trials receiving either probiotics or placebo treatment.**

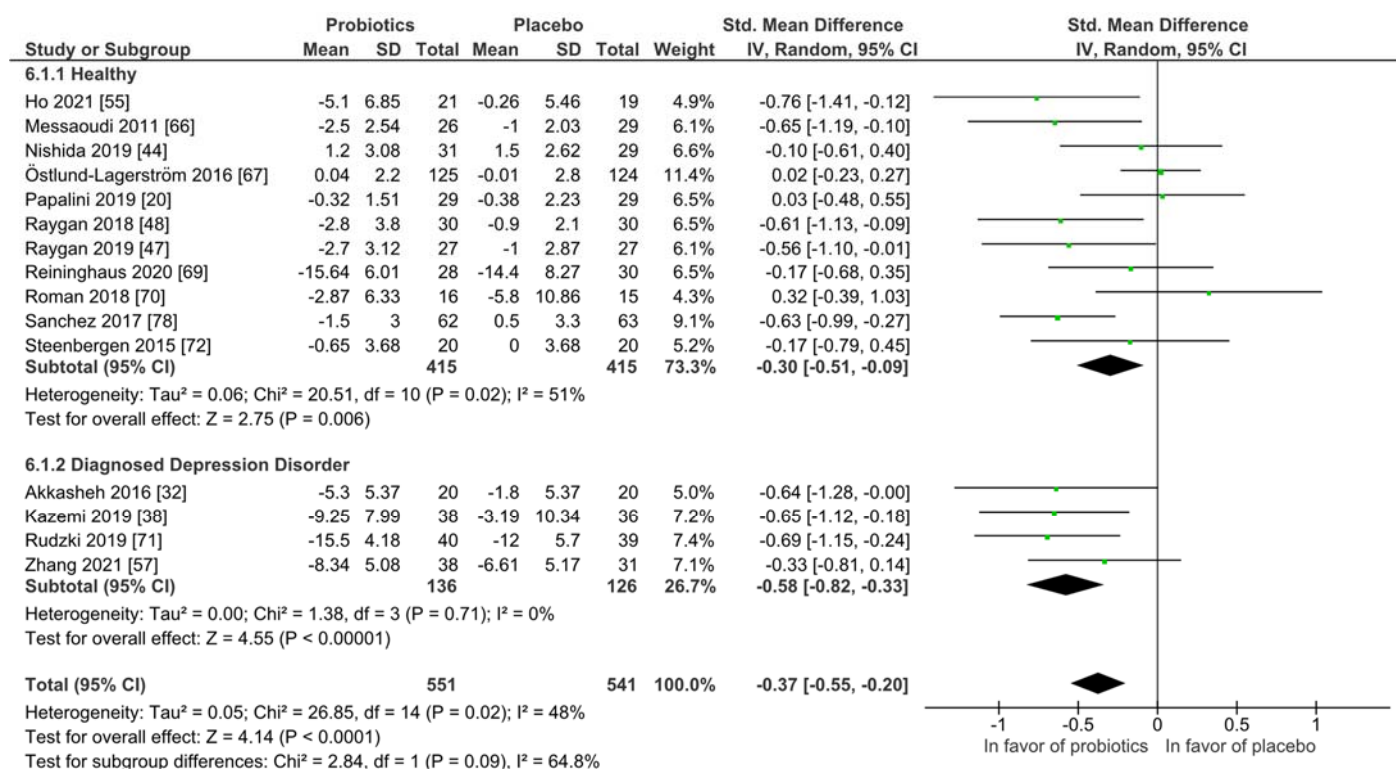

**Figure S12. Overview of depression symptom outcomes according to questionnaire.** Since several studies incorporated more than one questionnaire for the same outcome, no total summary across all questionnaires is presented here.

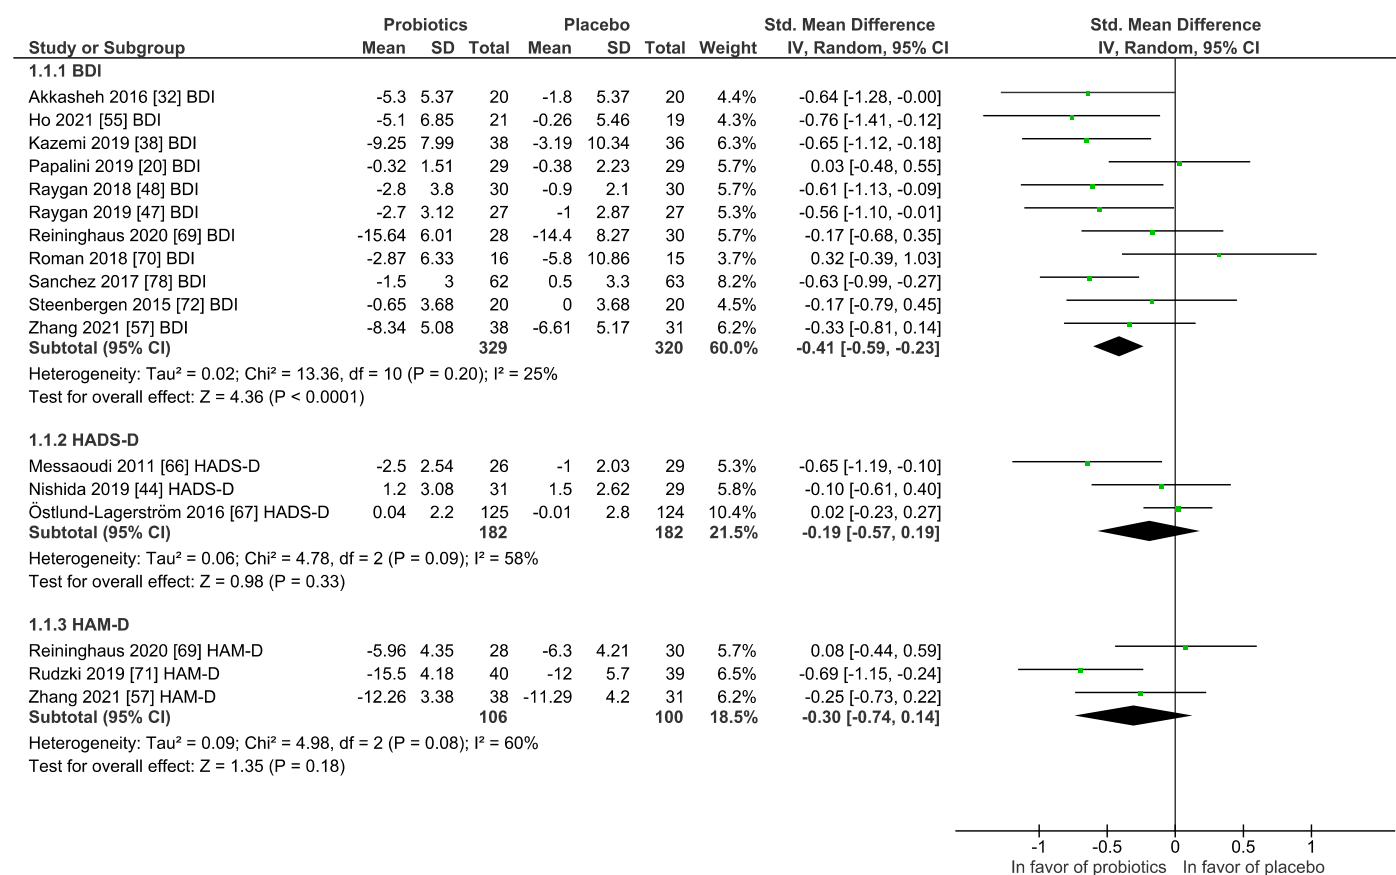

**Figure S13. Effect of intake period on Psychiatric Distress of randomized controlled trials receiving either probiotics or placebo treatment.**

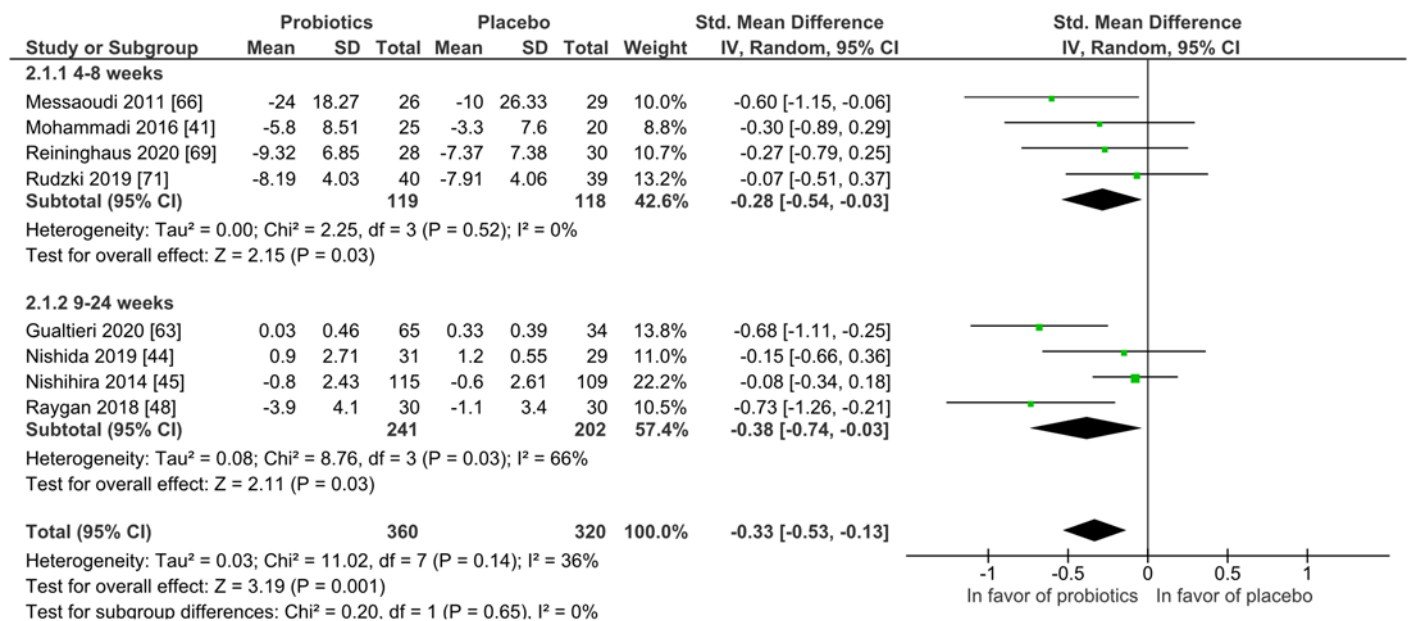

**Figure S14. Effect of single-strain versus multi-strain probiotics on Psychiatric Distress in randomized controlled trials receiving either probiotics or placebo treatment.** Only two studies used single-strain probiotics so that no subgroup-analysis could be conducted for this subgroup.

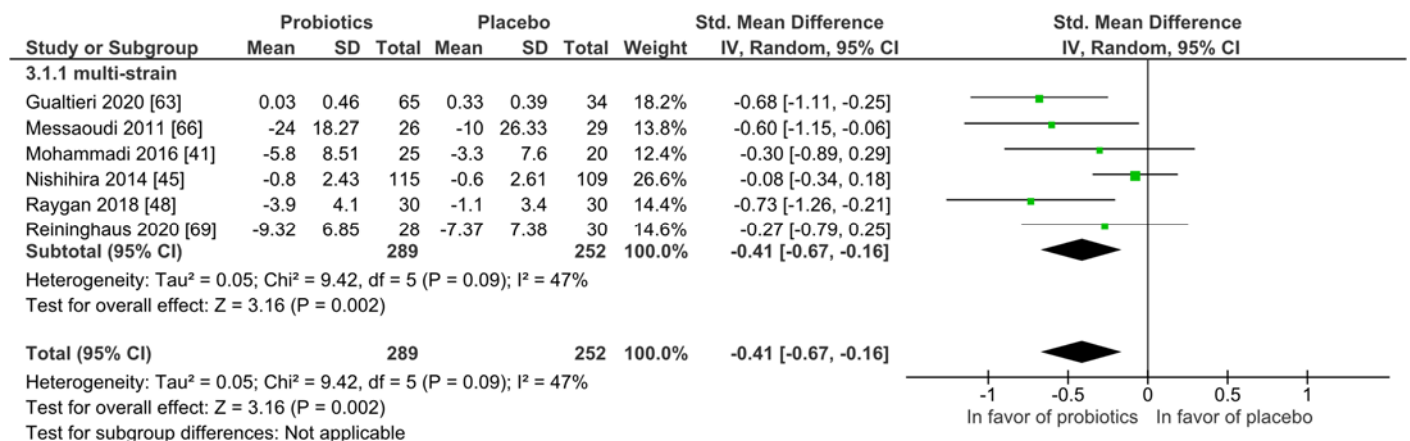

**Figure S15. Effect of studies from Asia versus studies from Europe on Psychiatric Distress in randomized controlled trials receiving either probiotics or placebo treatment.**

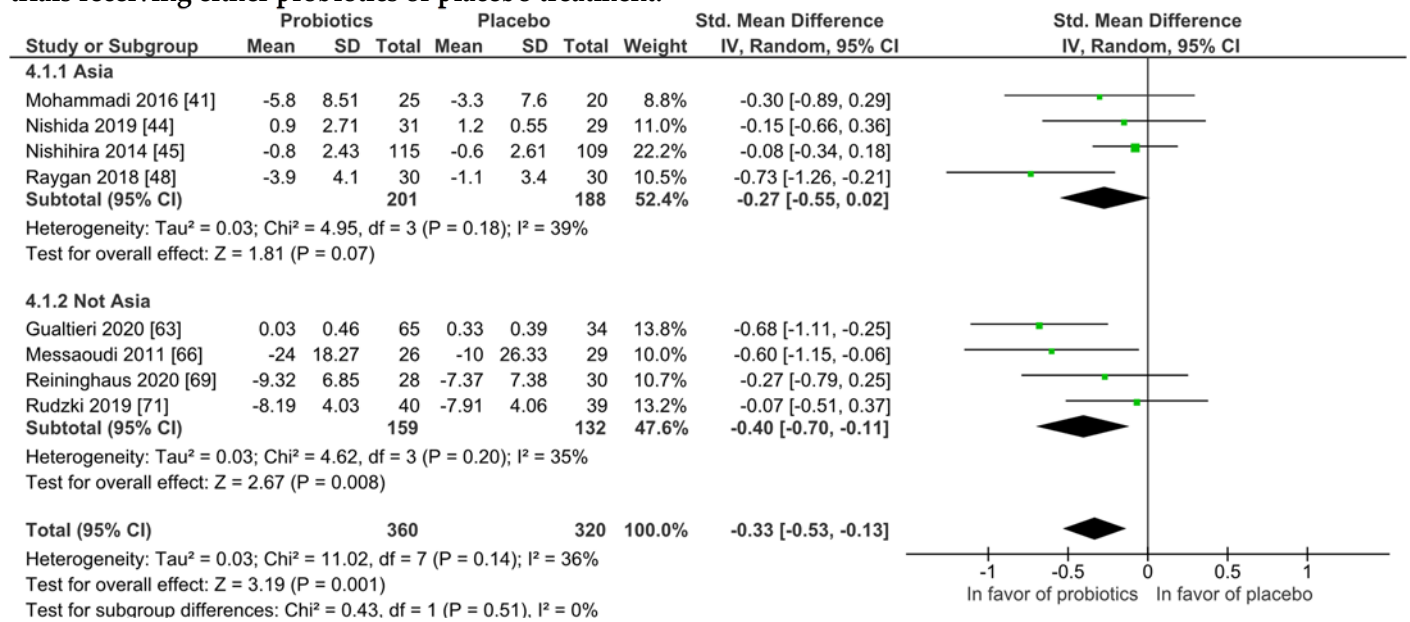

**Figure S16. Effect of application form on Psychiatric Distress of randomized controlled trials receiving either probiotics or placebo treatment.**

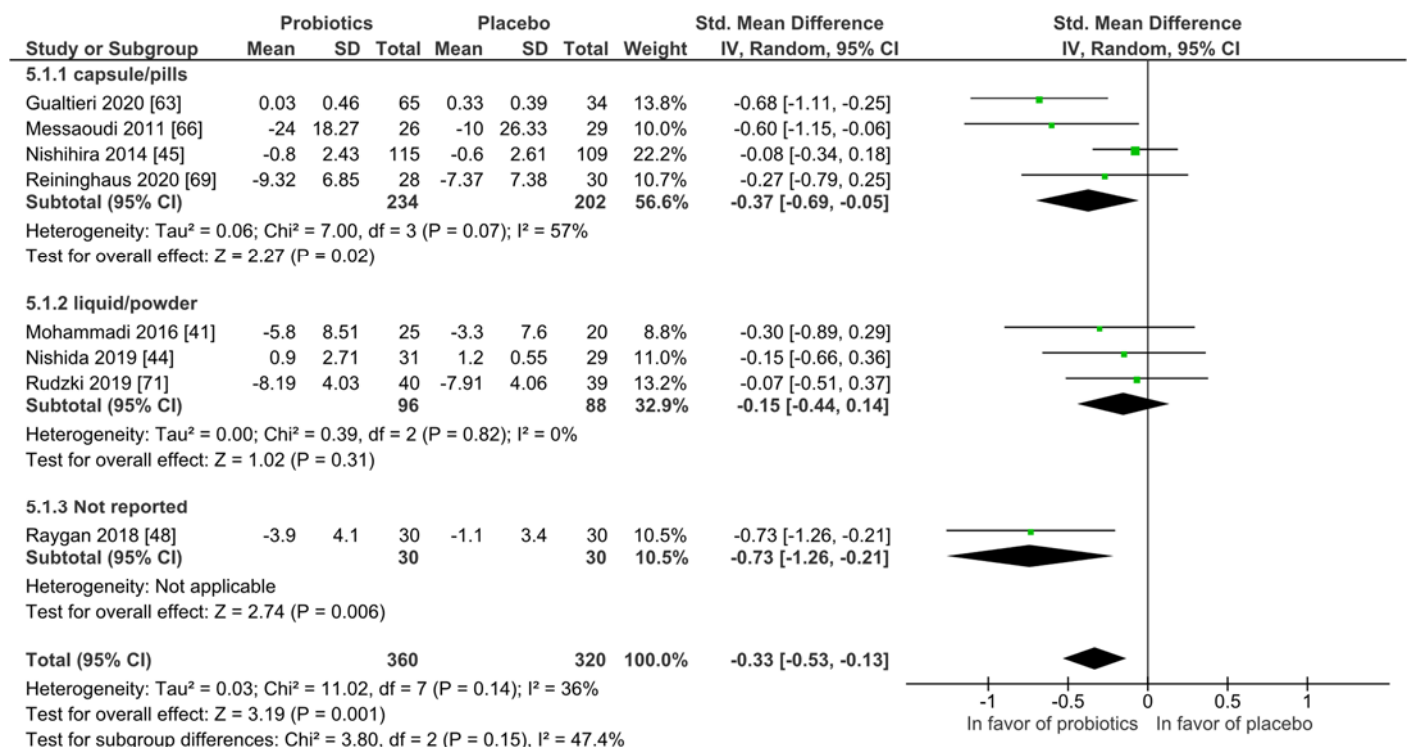

**Figure S17. Effect of studies with healthy participants on Psychiatric Distress in randomized controlled trials receiving either probiotics or placebo treatment.**

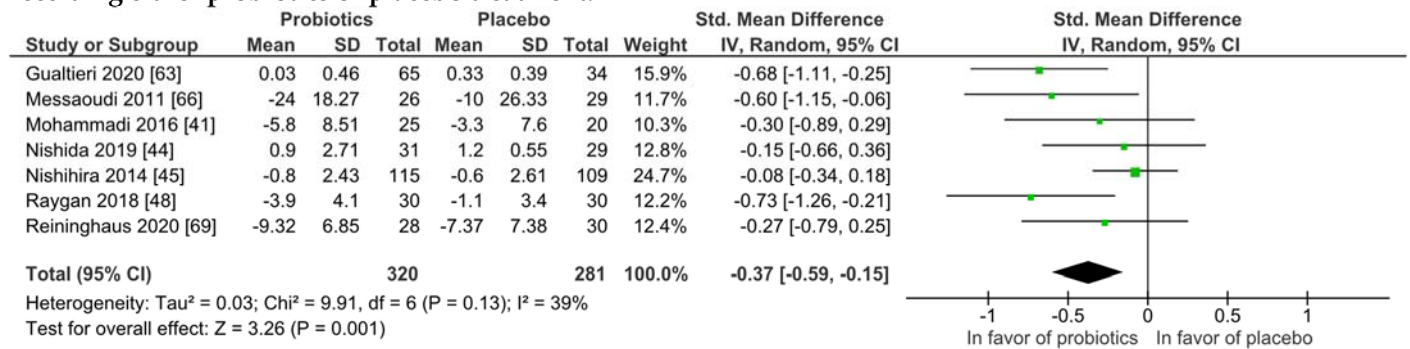

**Figure S18. Overview of psychiatric distress symptom outcomes according to questionnaire.** Since several studies incorporated more than one questionnaire for the same outcome, no total summary across all questionnaires is presented here.

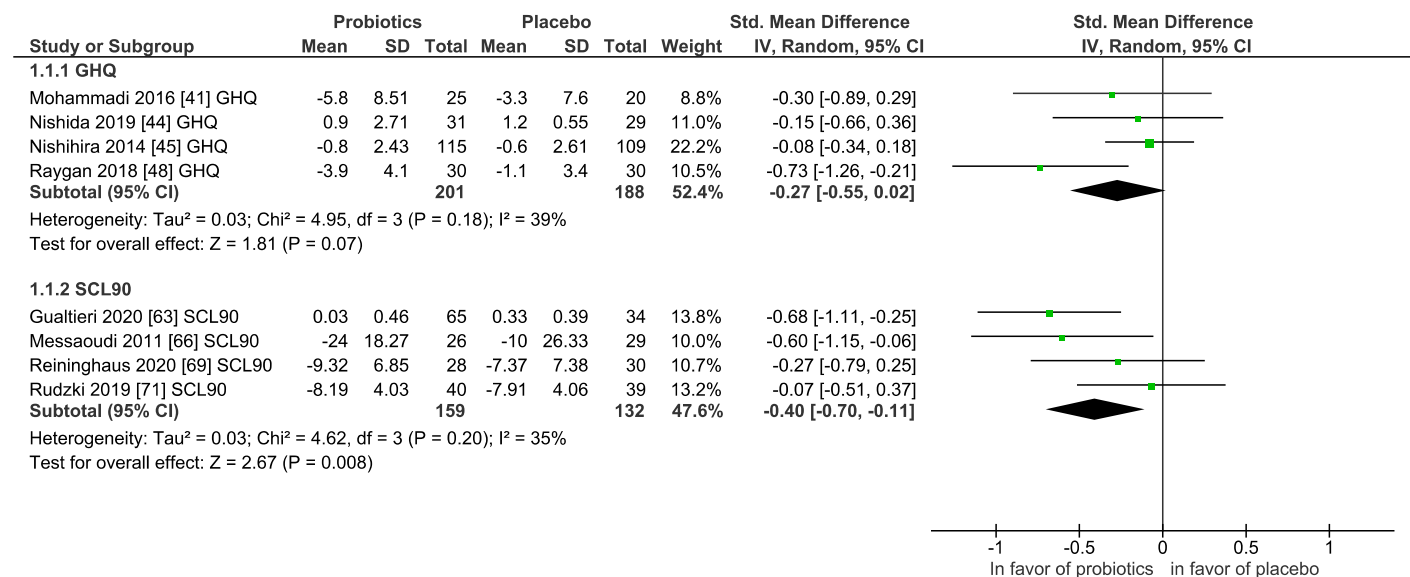

Supplement: s1 [file s1]
